# Supplementary material for: Effect of School-Based Home-Collaborative Lifestyle Education on Reducing Subjective Psychosomatic Symptoms in Adolescents: A Cluster Randomised Controlled Trial
Source: PubMed Central journal article supplement (PMC5079616; doi:10.1371/journal.pone.0165285), 2016-10-25
Supplement: pone.0165285.s002.pdf [file pone.0165285.s002.pdf]

S1 Fig. Japanese Version and English translated versions of questionnaire.

Japanese version

中学生の食事・生活習慣と健康質問票 ( )年( )組( )番 氏名( )

---

最近1ヶ月くらいのあなたの食事や生活、健康状態について、あてはまる番号を○で囲んでください。

|    |                                |             |              |              |              |             |
|----|--------------------------------|-------------|--------------|--------------|--------------|-------------|
| 1  | ♪ 朝食に、ごはん・パン・めんなどの主食を食べる。      | 1. いつもできる   | 2. 週に5~6回できる | 3. 週に3~4回できる | 4. 週に1~2回できる | 5. まったくできない |
| 2  | ♪ 朝食に、卵・魚・肉・とうふ・大豆製品などの主菜を食べる。 | 1. いつもできる   | 2. 週に5~6回できる | 3. 週に3~4回できる | 4. 週に1~2回できる | 5. まったくできない |
| 3  | ♪ 朝食に、野菜類を食べる。                 | 1. いつもできる   | 2. 週に5~6回できる | 3. 週に3~4回できる | 4. 週に1~2回できる | 5. まったくできない |
| 4  | ♪ 昼食に、卵・魚・肉・とうふ・大豆製品などの主菜を食べる。 | 1. いつもできる   | 2. 週に5~6回できる | 3. 週に3~4回できる | 4. 週に1~2回できる | 5. まったくできない |
| 5  | ♪ 昼食に、野菜類を食べる。                 | 1. いつもできる   | 2. 週に5~6回できる | 3. 週に3~4回できる | 4. 週に1~2回できる | 5. まったくできない |
| 6  | ♪ 牛乳・ヨーグルト・豆乳などの乳製品を食べる。       | 1. いつもできる   | 2. 週に5~6回できる | 3. 週に3~4回できる | 4. 週に1~2回できる | 5. まったくできない |
| 7  | ♪ 油の多い料理や食品をとり過ぎないようにする。       | 1. いつもできる   | 2. 週に5~6回できる | 3. 週に3~4回できる | 4. 週に1~2回できる | 5. まったくできない |
| 8  | ♪ 夜10時以降の間食は食べない。              | 1. いつもできる   | 2. 週に5~6回できる | 3. 週に3~4回できる | 4. 週に1~2回できる | 5. まったくできない |
| 9  | ♪ 運動やストレッチなど体を動かす。             | 1. いつもできる   | 2. 週に5~6回できる | 3. 週に3~4回できる | 4. 週に1~2回できる | 5. まったくできない |
| 10 | ♪ 夜12時には、ぐっすり眠っている。            | 1. いつもできる   | 2. 週に5~6回できる | 3. 週に3~4回できる | 4. 週に1~2回できる | 5. まったくできない |
| 11 | ♪ 睡眠時間は、6時間以上である。              | 1. いつもできる   | 2. 週に5~6回できる | 3. 週に3~4回できる | 4. 週に1~2回できる | 5. まったくできない |
| 12 | ♪ 現在、自分の健康状態は                  | 1. とてもよい    | 2. まあよい      | 3. どちらともいえない | 4. あまりよくない   | 5. よくない     |
| 13 | ♪ 学校生活が楽しい                     | 1. まったく感じない | 2. あまり感じない   | 3. ときどき感じる   | 4. かなり感じる    | 5. いつも感じる   |
| 14 | ♪ 疲れを感じる                       | 1. まったく感じない | 2. あまり感じない   | 3. ときどき感じる   | 4. かなり感じる    | 5. いつも感じる   |
| 15 | ♪ 頭痛がする                        | 1. まったく感じない | 2. あまり感じない   | 3. ときどき感じる   | 4. かなり感じる    | 5. いつも感じる   |
| 16 | ♪ 身体がだるい                       | 1. まったく感じない | 2. あまり感じない   | 3. ときどき感じる   | 4. かなり感じる    | 5. いつも感じる   |
| 17 | ♪ イライラする                       | 1. まったく感じない | 2. あまり感じない   | 3. ときどき感じる   | 4. かなり感じる    | 5. いつも感じる   |
| 18 | ♪ 集中力がない                       | 1. まったく感じない | 2. あまり感じない   | 3. ときどき感じる   | 4. かなり感じる    | 5. いつも感じる   |
| 19 | ♪ やる気がでない                      | 1. まったく感じない | 2. あまり感じない   | 3. ときどき感じる   | 4. かなり感じる    | 5. いつも感じる   |
| 20 | ♪ 朝、すっきり起きられない                 | 1. まったく感じない | 2. あまり感じない   | 3. ときどき感じる   | 4. かなり感じる    | 5. いつも感じる   |
| 21 | ♪ 胃やお腹の調子が悪い                   | 1. まったく感じない | 2. あまり感じない   | 3. ときどき感じる   | 4. かなり感じる    | 5. いつも感じる   |
| 22 | ♪ 肩がこる                         | 1. まったく感じない | 2. あまり感じない   | 3. ときどき感じる   | 4. かなり感じる    | 5. いつも感じる   |

## English translated version

Questionnaire of dietary intakes, lifestyle and health conditions for middle school students  
 Name( ) No( ) Class( ) School year( )

Please circle the number applied for your dietary intakes, lifestyle and health condition for recently one month..

|    |                                                         |               |             |              |                |                 |
|----|---------------------------------------------------------|---------------|-------------|--------------|----------------|-----------------|
| 1  | ♪ You consume staple food per breakfast.                | 1. Always     | 2. 5-6/wk   | 3. 3-4/wk    | 4. 1-2/wk      | 5. Not at all   |
| 2  | ♪ You consume main dishes per breakfast.                | 1. Always     | 2. 5-6/wk   | 3. 3-4/wk    | 4. 1-2/wk      | 5. Not at all   |
| 3  | ♪ You consume vegetables per breakfast.                 | 1. Always     | 2. 5-6/wk   | 3. 3-4/wk    | 4. 1-2/wk      | 5. Not at all   |
| 4  | ♪ You consume main dishes per lunch.                    | 1. Always     | 2. 5-6/wk   | 3. 3-4/wk    | 4. 1-2/wk      | 5. Not at all   |
| 5  | ♪ You consume vegetables per lunch.                     | 1. Always     | 2. 5-6/wk   | 3. 3-4/wk    | 4. 1-2/wk      | 5. Not at all   |
| 6  | ♪ You consume dairy products per day.                   | 1. Always     | 2. 5-6/wk   | 3. 3-4/wk    | 4. 1-2/wk      | 5. Not at all   |
| 7  | ♪ You don't consume fatty foods.                        | 1. Always     | 2. 5-6/wk   | 3. 3-4/wk    | 4. 1-2/wk      | 5. Not at all   |
| 8  | ♪ You don't consume snacks after 10 PM                  | 1. Always     | 2. 5-6/wk   | 3. 3-4/wk    | 4. 1-2/wk      | 5. Not at all   |
| 9  | ♪ You move your body, such as exercise and stretching.. | 1. Always     | 2. 5-6/wk   | 3. 3-4/wk    | 4. 1-2/wk      | 5. Not at all   |
| 10 | ♪ You sleep fast at 0 AM.                               | 1. Always     | 2. 5-6/wk   | 3. 3-4/wk    | 4. 1-2/wk      | 5. Not at all   |
| 11 | ♪ You sleep over 6 hours.                               | 1. Always     | 2. 5-6/wk   | 3. 3-4/wk    | 4. 1-2/wk      | 5. Not at all   |
| 12 | ♪ How are your health condition, now ?                  | 1. Very good  | 2. Good     | 3. As usual  | 4. Fairly good | 5. Not good/bad |
| 13 | ♪ You feel school life is enjoyable.                    | 1. Not at all | 2. Scarcely | 3. Sometimes | 4. Often       | 5. Always       |
| 14 | ♪ You feel fatigue.                                     | 1. Not at all | 2. Scarcely | 3. Sometimes | 4. Often       | 5. Always       |
| 15 | ♪ You feel headache.                                    | 1. Not at all | 2. Scarcely | 3. Sometimes | 4. Often       | 5. Always       |
| 16 | ♪ You feel lassitude                                    | 1. Not at all | 2. Scarcely | 3. Sometimes | 4. Often       | 5. Always       |
| 17 | ♪ You feel irritation.                                  | 1. Not at all | 2. Scarcely | 3. Sometimes | 4. Often       | 5. Always       |
| 18 | ♪ You feel lack of concentration.                       | 1. Not at all | 2. Scarcely | 3. Sometimes | 4. Often       | 5. Always       |
| 19 | ♪ You feel lack of motivation.                          | 1. Not at all | 2. Scarcely | 3. Sometimes | 4. Often       | 5. Always       |
| 20 | ♪ You feel poor ability to wake in the morning.         | 1. Not at all | 2. Scarcely | 3. Sometimes | 4. Often       | 5. Always       |
| 21 | ♪ You feel upset stomach.                               | 1. Not at all | 2. Scarcely | 3. Sometimes | 4. Often       | 5. Always       |
| 22 | ♪ You feel stiff shoulders.                             | 1. Not at all | 2. Scarcely | 3. Sometimes | 4. Often       | 5. Always       |
