# Supplementary material for: Effect of School-Based Home-Collaborative Lifestyle Education on Reducing Subjective Psychosomatic Symptoms in Adolescents: A Cluster Randomised Controlled Trial
Source: PubMed Central journal article supplement (PMC5079616; doi:10.1371/journal.pone.0165285), 2016-10-25

## S2 Fig. Validity and reliability of the SPS score

a) SPS score by assuming the Likert scale

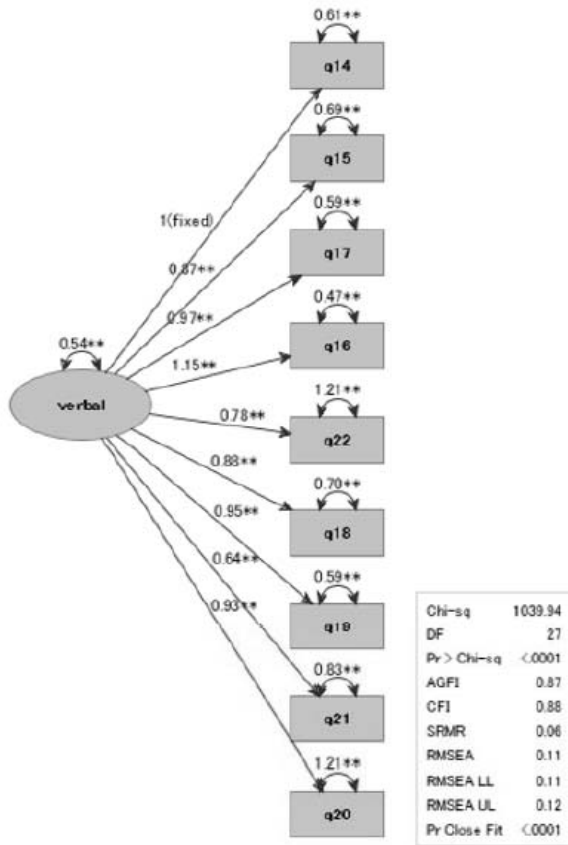

b) SPS-D score by dichotomous variable

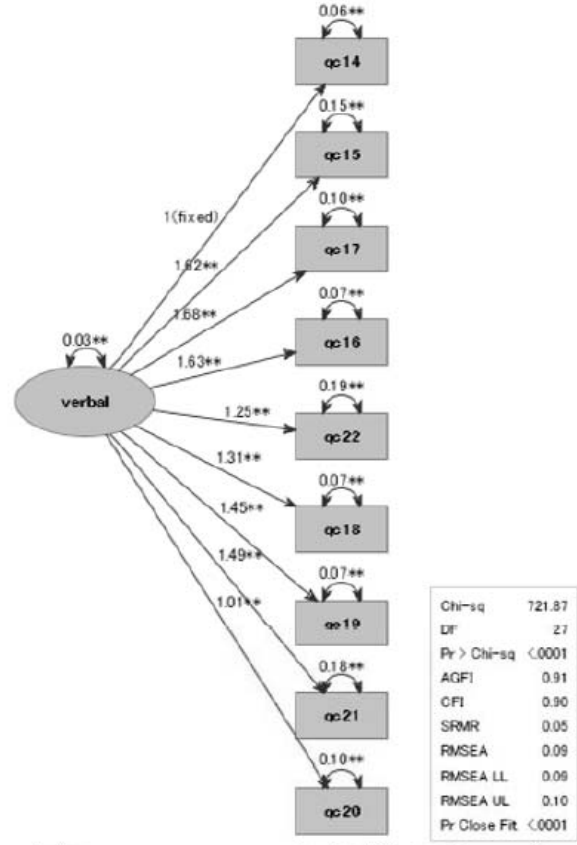

Supplement: pone.0165285.s003.pdf [file pone.0165285.s003.pdf]
