# Supplementary material for: Effect of School-Based Home-Collaborative Lifestyle Education on Reducing Subjective Psychosomatic Symptoms in Adolescents: A Cluster Randomised Controlled Trial
Source: PubMed Central journal article supplement (PMC5079616; doi:10.1371/journal.pone.0165285), 2016-10-25
Supplement: pone.0165285.s004.pdf [file pone.0165285.s004.pdf]

|    |  |
|----|--|
| No |  |
|----|--|

## FFQW82 調査票（食物摂取頻度調査）

### ご回答方法

この調査は、およそ 15~20 分程度かかりますが、各項目全部にお答えいただくと、ご自身の平均的な 1 日の食事量や各栄養素の摂取量がわかります。

- この調査票のたての行には、82種類の食べ物(ごはん、塩さけ、薄切り肉など)が並んでいます。
- この調査票のよこの列には、朝食、昼食、夕食別に、各食べ物の「1 回に食べる回数」と「一回に食べる量」を示しています。
- この 1 ヶ月間でのご自身の食生活に最も近いと思われる□に「レ印」を記入してください。
- 1~82 種類の食べ物について、朝食、昼食、夕食ごとすべてにお答えください。

★ 「1 回に食べる回数」は、以下の 6 段階です。

「全く食べない」

「月に 1~2 回食べる」

「週に 1~2 回食べる」

「週に 3~4 回食べる」

「週に 5~6 回食べる」

「いつも食べる」

\* 「全く食べない」食べ物にも  
「レ印」を記入してください。

★ 「1 回に食べる量」は、「大」、「中」、「小」とします。

「中」とは、この調査票に示した**写真の量**が目安になります。

「小」とは、「中」の**半分**くらいです。

「大」とは、「中」の**1.5 倍**くらいです。

「全く食べない」場合は、「1 回に食べる量」は記入しなくても結構です。

※ただし 午前中の間食は朝食の回答欄に朝食と合わせてご記入ください。  
午後中の間食は昼食の回答欄に昼食と合わせてご記入ください。  
夕食後に食べたものは、夕食の回答欄に合わせてご記入ください。

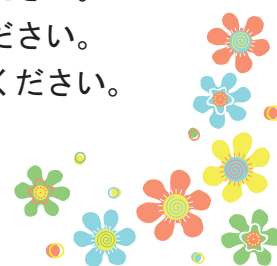

FFQW82 (食物摂取頻度調査)

下記の食品は、どのくらいの頻度で食べますか。また、食べる時の1回量はどのくらいですか。

1. 食べる頻度は、「全く食べない」から「食事でいつも食べる」の6段階のいずれかの欄に「レ」点をつけてください
2. 一回に食べる量は「大」、「中」、「小」いずれかの欄に「レ」点を記入してください  
下記に示した各食品の目安量が「中」です

「レ」点の記入例

【「中」の食品例】

|     | 食品 | 朝食 (午前中の間食を含む)                 |                             |                          |                              |                                 |        | 昼食 (午後中の間食を含む) |        |       |       |       |        | 夕食 (夜食を含む) |        |       |       |       |        |   |   |   |   |   |   |
|-----|----|--------------------------------|-----------------------------|--------------------------|------------------------------|---------------------------------|--------|----------------|--------|-------|-------|-------|--------|------------|--------|-------|-------|-------|--------|---|---|---|---|---|---|
|     |    | 0                              | 1                           | 2                        | 3                            | 4                               | 5      | 0              | 1      | 2     | 3     | 4     | 5      | 0          | 1      | 2     | 3     | 4     | 5      |   |   |   |   |   |   |
|     |    | 全く食べない                         | 月に1~2回                      | 週1~2回                    | 週3~4回                        | 週5~6回                           | 朝食にいつも | 全く食べない         | 月に1~2回 | 週1~2回 | 週3~4回 | 週5~6回 | 昼食にいつも | 全く食べない     | 月に1~2回 | 週1~2回 | 週3~4回 | 週5~6回 | 夕食にいつも |   |   |   |   |   |   |
|     |    | 1回量                            |                             |                          | 1回量                          |                                 |        | 1回量            |        |       | 1回量   |       |        |            |        |       |       |       |        |   |   |   |   |   |   |
|     |    | 小                              | 中                           | 大                        | 小                            | 中                               | 大      | 小              | 中      | 大     | 小     | 中     | 大      | 小          | 中      | 大     | 小     | 中     | 大      |   |   |   |   |   |   |
| 穀類  | 1  | ごはん、赤飯、五目ごはん<br>中茶わん1膳         | おにぎり                        | いなり寿司 3個<br>太巻寿司 3個      | もち 2個                        | 1                               | 0      | 1              | 2      | 3     | 4     | 5     | 0      | 1          | 2      | 3     | 4     | 5     | 0      | 1 | 2 | 3 | 4 | 5 |   |
|     | 2  | カレーライス・ハヤシライス・<br>チャーハン など 1人前 | 弁当・定食のごはん<br>1人前            |                          |                              | 2                               | 0      | 1              | 2      | 3     | 4     | 5     | 0      | 1          | 2      | 3     | 4     | 5     | 0      | 1 | 2 | 3 | 4 | 5 |   |
|     | 3  | にぎり寿司・カツ丼・親子丼・中華丼 など 1人前       |                             |                          |                              | 3                               | 0      | 1              | 2      | 3     | 4     | 5     | 0      | 1          | 2      | 3     | 4     | 5     | 0      | 1 | 2 | 3 | 4 | 5 |   |
|     | 4  | 食パン<br>6枚切り1枚                  | ロールパン 2個<br>クロワッサン 1個       | フランスパン<br>2cm幅3切れ        | サンドイッチ<br>2切れ                | 4                               | 0      | 1              | 2      | 3     | 4     | 5     | 0      | 1          | 2      | 3     | 4     | 5     | 0      | 1 | 2 | 3 | 4 | 5 |   |
|     | 5  | うどん・そば など<br>1人前               | そうめん<br>1.5束                |                          |                              | 5                               | 0      | 1              | 2      | 3     | 4     | 5     | 0      | 1          | 2      | 3     | 4     | 5     | 0      | 1 | 2 | 3 | 4 | 5 |   |
|     | 6  | ラーメン・焼きそば<br>1人前               | インスタントラーメン<br>カップラーメン<br>1個 |                          |                              | 6                               | 0      | 1              | 2      | 3     | 4     | 5     | 0      | 1          | 2      | 3     | 4     | 5     | 0      | 1 | 2 | 3 | 4 | 5 |   |
|     | 7  | スパゲティ・ペンネなどパスタ類                |                             |                          |                              | 7                               | 0      | 1              | 2      | 3     | 4     | 5     | 0      | 1          | 2      | 3     | 4     | 5     | 0      | 1 | 2 | 3 | 4 | 5 |   |
|     | 8  | じゃがいも<br>中3個                   | 里芋<br>中3個                   | さつまいも<br>中1/3本           | ポテトサラダ・肉じゃが<br>ポテトコロッケ<br>2個 | 8                               | 0      | 1              | 2      | 3     | 4     | 5     | 0      | 1          | 2      | 3     | 4     | 5     | 0      | 1 | 2 | 3 | 4 | 5 |   |
|     | 9  | コーンフレーク<br>1杯分                 |                             |                          |                              | 9                               | 0      | 1              | 2      | 3     | 4     | 5     | 0      | 1          | 2      | 3     | 4     | 5     | 0      | 1 | 2 | 3 | 4 | 5 |   |
|     | 10 | ピザ<br>1人前                      | ホットケーキ<br>(パンケーキ)2枚分        | お好み焼き 1枚分<br>たこ焼き 8個     | マカロニサラダ<br>小鉢1杯              | 10                              | 0      | 1              | 2      | 3     | 4     | 5     | 0      | 1          | 2      | 3     | 4     | 5     | 0      | 1 | 2 | 3 | 4 | 5 |   |
|     | 11 | ぎょうざ 5個                        | しゅうまい<br>大3個                | 春巻き<br>2本                | これらの皮・片栗粉など                  | 11                              | 0      | 1              | 2      | 3     | 4     | 5     | 0      | 1          | 2      | 3     | 4     | 5     | 0      | 1 | 2 | 3 | 4 | 5 |   |
| 魚介類 | 12 | 塩さけ<br>1切れ                     | あじ開き<br>1枚                  | ほっけ開き<br>1/2枚            | みそ漬け魚・かす漬け魚<br>1切れ           | 12                              | 0      | 1              | 2      | 3     | 4     | 5     | 0      | 1          | 2      | 3     | 4     | 5     | 0      | 1 | 2 | 3 | 4 | 5 |   |
|     | 13 | あじたたき<br>1尾分                   | たい・ひらめ刺身<br>5切れ             | めかじき・たら<br>かれい など 1切れ    |                              | 13                              | 0      | 1              | 2      | 3     | 4     | 5     | 0      | 1          | 2      | 3     | 4     | 5     | 0      | 1 | 2 | 3 | 4 | 5 |   |
|     | 14 | さんま<br>1/2尾                    | さば<br>1/4尾                  | ぶり・銀だら・さわら<br>1切れ        | まぐろ・かつお・はまち<br>刺身 4切         | いわし 1尾                          | 14     | 0              | 1      | 2     | 3     | 4     | 5      | 0          | 1      | 2     | 3     | 4     | 5      | 0 | 1 | 2 | 3 | 4 | 5 |
|     | 15 | えび                             | いか<br>1/2杯                  | まだこ<br>足1本分              |                              | 15                              | 0      | 1              | 2      | 3     | 4     | 5     | 0      | 1          | 2      | 3     | 4     | 5     | 0      | 1 | 2 | 3 | 4 | 5 |   |
|     | 16 | ほたて貝柱<br>2個                    | あさり<br>10~12個               | しじみ味噌汁                   | カキ<br>3個                     | 16                              | 0      | 1              | 2      | 3     | 4     | 5     | 0      | 1          | 2      | 3     | 4     | 5     | 0      | 1 | 2 | 3 | 4 | 5 |   |
|     | 17 | しらす干し                          | たらこ 1/2本<br>いくら 大さじ2        | 塩辛                       | 貝・のり等佃煮<br>大さじ1杯             | 17                              | 0      | 1              | 2      | 3     | 4     | 5     | 0      | 1          | 2      | 3     | 4     | 5     | 0      | 1 | 2 | 3 | 4 | 5 |   |
|     | 18 | かまぼこ                           | 焼きちくわ                       | さつまあげ<br>1枚              |                              | 18                              | 0      | 1              | 2      | 3     | 4     | 5     | 0      | 1          | 2      | 3     | 4     | 5     | 0      | 1 | 2 | 3 | 4 | 5 |   |
|     | 19 | 小)ツナ缶<br>1/2缶                  | さば味噌煮缶<br>1/3缶              | さんまかば焼き缶<br>いわし味噌煮缶 1/2缶 |                              | 19                              | 0      | 1              | 2      | 3     | 4     | 5     | 0      | 1          | 2      | 3     | 4     | 5     | 0      | 1 | 2 | 3 | 4 | 5 |   |
| 肉類  | 20 | しょうが焼き<br>3枚                   | 豚カツ<br>1/2枚                 | 肉煮込み<br>小鉢1杯             | 肉野菜炒め<br>1皿                  | 串カツ 2本                          | 20     | 0              | 1      | 2     | 3     | 4     | 5      | 0          | 1      | 2     | 3     | 4     | 5      | 0 | 1 | 2 | 3 | 4 | 5 |
|     | 21 | 鶏もも肉                           | からあげ<br>3個                  | 焼き鳥<br>2本                | 筑前煮<br>小鉢1杯                  | 煮物、野菜炒め、スープなど<br>に入る肉やひき肉も合わせて、 | 21     | 0              | 1      | 2     | 3     | 4     | 5      | 0          | 1      | 2     | 3     | 4     | 5      | 0 | 1 | 2 | 3 | 4 | 5 |
|     | 22 | ステーキ<br>1/2枚                   | 牛丼<br>1人前                   | ビーフシチュー<br>1人前           | 牛肉薄切り<br>2枚                  |                                 | 22     | 0              | 1      | 2     | 3     | 4     | 5      | 0          | 1      | 2     | 3     | 4     | 5      | 0 | 1 | 2 | 3 | 4 | 5 |
|     | 23 | ハンバーグ<br>1個                    | ミートボール<br>3個                | メンチカツ<br>1個              | ミートソース・その他<br>ひき肉料理<br>1人前   |                                 | 23     | 0              | 1      | 2     | 3     | 4     | 5      | 0          | 1      | 2     | 3     | 4     | 5      | 0 | 1 | 2 | 3 | 4 | 5 |
|     | 24 | ハム<br>2枚                       | ウインナー<br>2本                 | ベーコン<br>2枚               |                              | 24                              | 0      | 1              | 2      | 3     | 4     | 5     | 0      | 1          | 2      | 3     | 4     | 5     | 0      | 1 | 2 | 3 | 4 | 5 |   |
|     | 25 | レバー・タン・ハツなど<br>2串              | もつ煮<br>1人前                  |                          |                              | 25                              | 0      | 1              | 2      | 3     | 4     | 5     | 0      | 1          | 2      | 3     | 4     | 5     | 0      | 1 | 2 | 3 | 4 | 5 |   |

| 下記の食品は、どのくらいの頻度で食べますか。また、食べる時の1回量はどのくらいですか。<br>1. 食べる頻度は、「全く食べない」から「食事でもいつも食べる」の6段階のいずれかの欄に「レ」点をつけてください<br>2. 一回に食べる量は「大」、「中」、「小」いずれかの欄に「レ」点を記入してください<br>下記に示した各食品の目安量が「中」です<br>「レ」点の記入例 <input checked="" type="checkbox"/> 【「中」の食品例】 |    |  |                                             | 朝食 (午前中の間食を含む) |                   |                                 |                      |       |           | 昼食 (午後中の間食を含む) |   |   |        |        |       | 夕食 (夜食を含む) |       |        |     |   |   |        |        |       |       |       |        |     |   |   |   |   |   |   |   |   |   |
|----------------------------------------------------------------------------------------------------------------------------------------------------------------------------------------------------------------------------------------|----|--|---------------------------------------------|----------------|-------------------|---------------------------------|----------------------|-------|-----------|----------------|---|---|--------|--------|-------|------------|-------|--------|-----|---|---|--------|--------|-------|-------|-------|--------|-----|---|---|---|---|---|---|---|---|---|
|                                                                                                                                                                                                                                        |    |  |                                             | 0              | 1                 | 2                               | 3                    | 4     | 5         | 1回量            |   |   | 0      | 1      | 2     | 3          | 4     | 5      | 1回量 |   |   | 0      | 1      | 2     | 3     | 4     | 5      | 1回量 |   |   |   |   |   |   |   |   |   |
|                                                                                                                                                                                                                                        |    |  |                                             | 全く食べない         | 月に1~2回            | 週1~2回                           | 週3~4回                | 週5~6回 | 朝食にいつも    | 小              | 中 | 大 | 全く食べない | 月に1~2回 | 週1~2回 | 週3~4回      | 週5~6回 | 昼食にいつも | 小   | 中 | 大 | 全く食べない | 月に1~2回 | 週1~2回 | 週3~4回 | 週5~6回 | 夕食にいつも | 小   | 中 | 大 |   |   |   |   |   |   |   |
| 卵                                                                                                                                                                                                                                      | 26 |  | たまご 1個                                      |                | 卵豆腐 1個(100g)      |                                 | 茶碗蒸し 大1個             | 26    | 0         | 1              | 2 | 3 | 4      | 5      | 小     | 中          | 大     | 0      | 1   | 2 | 3 | 4      | 5      | 小     | 中     | 大     | 0      | 1   | 2 | 3 | 4 | 5 | 小 | 中 | 大 |   |   |
| チーズ                                                                                                                                                                                                                                    | 27 |  | プロセスチーズ カマンベールチーズ 1切れ                       |                | スライスチーズ 1枚        |                                 | 6Pチーズ 1個             | 27    | 0         | 1              | 2 | 3 | 4      | 5      | 小     | 中          | 大     | 0      | 1   | 2 | 3 | 4      | 5      | 小     | 中     | 大     | 0      | 1   | 2 | 3 | 4 | 5 | 小 | 中 | 大 |   |   |
| 大豆類                                                                                                                                                                                                                                    | 28 |  | とうふ 1/2丁                                    |                | 凍りとうふ 1個          | 煮物、味噌汁などに入る豆腐や油あげ、厚揚げ、がんもも合わせて、 |                      | 28    | 0         | 1              | 2 | 3 | 4      | 5      | 小     | 中          | 大     | 0      | 1   | 2 | 3 | 4      | 5      | 小     | 中     | 大     | 0      | 1   | 2 | 3 | 4 | 5 | 小 | 中 | 大 |   |   |
|                                                                                                                                                                                                                                        | 29 |  | 納豆 小1個                                      |                | ゆで大豆 大さじ3         |                                 |                      |       | えだまめ 1カップ | 29             | 0 | 1 | 2      | 3      | 4     | 5          | 小     | 中      | 大   | 0 | 1 | 2      | 3      | 4     | 5     | 小     | 中      | 大   | 0 | 1 | 2 | 3 | 4 | 5 | 小 | 中 | 大 |
|                                                                                                                                                                                                                                        | 30 |  | 油あげ 1/4枚                                    |                |                   |                                 |                      |       |           | 30             | 0 | 1 | 2      | 3      | 4     | 5          | 小     | 中      | 大   | 0 | 1 | 2      | 3      | 4     | 5     | 小     | 中      | 大   | 0 | 1 | 2 | 3 | 4 | 5 | 小 | 中 | 大 |
|                                                                                                                                                                                                                                        | 31 |  | 厚揚げ 1/4枚                                    |                | がんも 中1/2個         |                                 |                      |       |           | 31             | 0 | 1 | 2      | 3      | 4     | 5          | 小     | 中      | 大   | 0 | 1 | 2      | 3      | 4     | 5     | 小     | 中      | 大   | 0 | 1 | 2 | 3 | 4 | 5 | 小 | 中 | 大 |
| 野菜・海そう類                                                                                                                                                                                                                                | 32 |  | サラダ 小鉢 1杯 (レタス・きゅうり・トマト)                    |                | せんきゃべつ 小鉢 1杯      |                                 | 大根サラダ 小鉢 1杯          | 32    | 0         | 1              | 2 | 3 | 4      | 5      | 小     | 中          | 大     | 0      | 1   | 2 | 3 | 4      | 5      | 小     | 中     | 大     | 0      | 1   | 2 | 3 | 4 | 5 | 小 | 中 | 大 |   |   |
|                                                                                                                                                                                                                                        | 33 |  | 青菜おひたし 小鉢 1杯                                |                | ブロッコリー 5ふさ        |                                 | いんげん・もやし 小鉢 1杯       | 33    | 0         | 1              | 2 | 3 | 4      | 5      | 小     | 中          | 大     | 0      | 1   | 2 | 3 | 4      | 5      | 小     | 中     | 大     | 0      | 1   | 2 | 3 | 4 | 5 | 小 | 中 | 大 |   |   |
|                                                                                                                                                                                                                                        | 34 |  | 野菜いため                                       |                | 八宝菜 中皿 1杯         |                                 |                      | 34    | 0         | 1              | 2 | 3 | 4      | 5      | 小     | 中          | 大     | 0      | 1   | 2 | 3 | 4      | 5      | 小     | 中     | 大     | 0      | 1   | 2 | 3 | 4 | 5 | 小 | 中 | 大 |   |   |
|                                                                                                                                                                                                                                        | 35 |  | 野菜煮物 小鉢 1杯 (大根・人参・ごぼう)                      |                | きんぴらごぼう 小鉢 1杯     |                                 | おでん・ふろふき大根 大根 1切れ    | 35    | 0         | 1              | 2 | 3 | 4      | 5      | 小     | 中          | 大     | 0      | 1   | 2 | 3 | 4      | 5      | 小     | 中     | 大     | 0      | 1   | 2 | 3 | 4 | 5 | 小 | 中 | 大 |   |   |
|                                                                                                                                                                                                                                        | 36 |  | かぼちゃ煮物                                      |                | かぼちゃサラダ           |                                 |                      | 36    | 0         | 1              | 2 | 3 | 4      | 5      | 小     | 中          | 大     | 0      | 1   | 2 | 3 | 4      | 5      | 小     | 中     | 大     | 0      | 1   | 2 | 3 | 4 | 5 | 小 | 中 | 大 |   |   |
|                                                                                                                                                                                                                                        | 37 |  | みそ汁や野菜スープ (キャベツ・大根・人参・玉ねぎ・長ねぎ など) 1杯分       |                |                   |                                 |                      | 37    | 0         | 1              | 2 | 3 | 4      | 5      | 小     | 中          | 大     | 0      | 1   | 2 | 3 | 4      | 5      | 小     | 中     | 大     | 0      | 1   | 2 | 3 | 4 | 5 | 小 | 中 | 大 |   |   |
|                                                                                                                                                                                                                                        | 38 |  | しいたけ、しめじ、えのき、エリンギなど 小鉢 1杯                   |                | なめこ 大さじ3杯分        |                                 |                      | 38    | 0         | 1              | 2 | 3 | 4      | 5      | 小     | 中          | 大     | 0      | 1   | 2 | 3 | 4      | 5      | 小     | 中     | 大     | 0      | 1   | 2 | 3 | 4 | 5 | 小 | 中 | 大 |   |   |
|                                                                                                                                                                                                                                        | 39 |  | こんにやく 1/4枚                                  |                | しらたき 1/3玉(袋)      |                                 |                      | 39    | 0         | 1              | 2 | 3 | 4      | 5      | 小     | 中          | 大     | 0      | 1   | 2 | 3 | 4      | 5      | 小     | 中     | 大     | 0      | 1   | 2 | 3 | 4 | 5 | 小 | 中 | 大 |   |   |
|                                                                                                                                                                                                                                        | 40 |  | 塩漬け、めか漬け 5切れ                                |                | たくあん漬け 3切れ        |                                 | 野沢菜、高菜、キムチ、福神漬 小皿 1杯 | 40    | 0         | 1              | 2 | 3 | 4      | 5      | 小     | 中          | 大     | 0      | 1   | 2 | 3 | 4      | 5      | 小     | 中     | 大     | 0      | 1   | 2 | 3 | 4 | 5 | 小 | 中 | 大 |   |   |
|                                                                                                                                                                                                                                        | 41 |  | ひじき煮物                                       |                | 生わかめ・めかぶ・もずく      |                                 |                      | 41    | 0         | 1              | 2 | 3 | 4      | 5      | 小     | 中          | 大     | 0      | 1   | 2 | 3 | 4      | 5      | 小     | 中     | 大     | 0      | 1   | 2 | 3 | 4 | 5 | 小 | 中 | 大 |   |   |
| 乳類                                                                                                                                                                                                                                     | 42 |  | 普通牛乳 コップ 1杯                                 |                |                   |                                 |                      | 42    | 0         | 1              | 2 | 3 | 4      | 5      | 小     | 中          | 大     | 0      | 1   | 2 | 3 | 4      | 5      | 小     | 中     | 大     | 0      | 1   | 2 | 3 | 4 | 5 | 小 | 中 | 大 |   |   |
|                                                                                                                                                                                                                                        | 43 |  | 低脂肪乳 コップ 1杯                                 |                | スキムミルク 大さじ 5杯     |                                 |                      | 43    | 0         | 1              | 2 | 3 | 4      | 5      | 小     | 中          | 大     | 0      | 1   | 2 | 3 | 4      | 5      | 小     | 中     | 大     | 0      | 1   | 2 | 3 | 4 | 5 | 小 | 中 | 大 |   |   |
|                                                                                                                                                                                                                                        | 44 |  | ヨーグルト 小鉢 1杯(100g)                           |                | カップ入りヨーグルト 1個     |                                 | 飲むヨーグルト              | 44    | 0         | 1              | 2 | 3 | 4      | 5      | 小     | 中          | 大     | 0      | 1   | 2 | 3 | 4      | 5      | 小     | 中     | 大     | 0      | 1   | 2 | 3 | 4 | 5 | 小 | 中 | 大 |   |   |
| 果物類                                                                                                                                                                                                                                    | 45 |  | みかん 中2個                                     |                | オレンジ・いよかん・夏みかん 1個 |                                 | グレープフルーツ 1/2個        | 45    | 0         | 1              | 2 | 3 | 4      | 5      | 小     | 中          | 大     | 0      | 1   | 2 | 3 | 4      | 5      | 小     | 中     | 大     | 0      | 1   | 2 | 3 | 4 | 5 | 小 | 中 | 大 |   |   |
|                                                                                                                                                                                                                                        | 46 |  | バナナ 1本                                      |                | りんご、なし、柿 1/2個     |                                 | すいか                  | 46    | 0         | 1              | 2 | 3 | 4      | 5      | 小     | 中          | 大     | 0      | 1   | 2 | 3 | 4      | 5      | 小     | 中     | 大     | 0      | 1   | 2 | 3 | 4 | 5 | 小 | 中 | 大 |   |   |
| 飲料                                                                                                                                                                                                                                     | 47 |  | 豆乳 コップ 1杯                                   |                |                   |                                 |                      | 47    | 0         | 1              | 2 | 3 | 4      | 5      | 小     | 中          | 大     | 0      | 1   | 2 | 3 | 4      | 5      | 小     | 中     | 大     | 0      | 1   | 2 | 3 | 4 | 5 | 小 | 中 | 大 |   |   |
|                                                                                                                                                                                                                                        | 48 |  | 野菜ジュース(人参・ミックスなど) コップ 1杯                    |                |                   |                                 |                      | 48    | 0         | 1              | 2 | 3 | 4      | 5      | 小     | 中          | 大     | 0      | 1   | 2 | 3 | 4      | 5      | 小     | 中     | 大     | 0      | 1   | 2 | 3 | 4 | 5 | 小 | 中 | 大 |   |   |
|                                                                                                                                                                                                                                        | 49 |  | 果物ジュース(オレンジ・グレープフルーツ・りんご・ぶどう・ミックスなど) コップ 1杯 |                |                   |                                 |                      | 49    | 0         | 1              | 2 | 3 | 4      | 5      | 小     | 中          | 大     | 0      | 1   | 2 | 3 | 4      | 5      | 小     | 中     | 大     | 0      | 1   | 2 | 3 | 4 | 5 | 小 | 中 | 大 |   |   |

|        |                                | 下記の食品は、どのくらいの頻度で食べますか。また、食べる時の1回量はどのくらいですか。<br>1. 食べる頻度は、「全く食べない」から「食事でいつも食べる」の6段階のいずれかの欄に「レ」点をつけてください<br>2. 一回に食べる量は「大」、「中」、「小」いずれかの欄に「レ」点を記入してください<br>下記に示した各食品の目安量が「中」です<br>「レ」点の記入例 <input checked="" type="checkbox"/> 【「中」の食品例】 |    | 朝食 (午前中の間食を含む) |        |       |       |       |        | 昼食 (午後中の間食を含む) |   |   |        |        |       | 夕食 (夜食を含む) |       |        |     |   |   |        |        |       |       |       |        |     |   |   |
|--------|--------------------------------|---------------------------------------------------------------------------------------------------------------------------------------------------------------------------------------------------------------------------------------|----|----------------|--------|-------|-------|-------|--------|----------------|---|---|--------|--------|-------|------------|-------|--------|-----|---|---|--------|--------|-------|-------|-------|--------|-----|---|---|
|        |                                |                                                                                                                                                                                                                                       |    | 0              | 1      | 2     | 3     | 4     | 5      | 1回量            |   |   | 0      | 1      | 2     | 3          | 4     | 5      | 1回量 |   |   | 0      | 1      | 2     | 3     | 4     | 5      | 1回量 |   |   |
|        |                                |                                                                                                                                                                                                                                       |    | 全く食べない         | 月に1~2回 | 週1~2回 | 週3~4回 | 週5~6回 | 朝食にいつも | 小              | 中 | 大 | 全く食べない | 月に1~2回 | 週1~2回 | 週3~4回      | 週5~6回 | 昼食にいつも | 小   | 中 | 大 | 全く食べない | 月に1~2回 | 週1~2回 | 週3~4回 | 週5~6回 | 夕食にいつも | 小   | 中 | 大 |
| アルコール類 | 50                             | 缶ビール500ml 1缶                                                                                                                                                                                                                          | 50 | 0              | 1      | 2     | 3     | 4     | 5      | 小              | 中 | 大 | 0      | 1      | 2     | 3          | 4     | 5      | 小   | 中 | 大 | 0      | 1      | 2     | 3     | 4     | 5      | 小   | 中 | 大 |
|        | 51                             | 日本酒 1合                                                                                                                                                                                                                                | 51 | 0              | 1      | 2     | 3     | 4     | 5      | 小              | 中 | 大 | 0      | 1      | 2     | 3          | 4     | 5      | 小   | 中 | 大 | 0      | 1      | 2     | 3     | 4     | 5      | 小   | 中 | 大 |
|        | 52                             | ワイン ワイングラス1杯                                                                                                                                                                                                                          | 52 | 0              | 1      | 2     | 3     | 4     | 5      | 小              | 中 | 大 | 0      | 1      | 2     | 3          | 4     | 5      | 小   | 中 | 大 | 0      | 1      | 2     | 3     | 4     | 5      | 小   | 中 | 大 |
|        | 53                             | 焼酎ストレート グラス1/4杯  缶入りサワー 1/2缶 サワー 大グラス1/2杯  ウイスキー シングル1杯  梅酒 グラス1杯                                                                                                                                                                     | 53 | 0              | 1      | 2     | 3     | 4     | 5      | 小              | 中 | 大 | 0      | 1      | 2     | 3          | 4     | 5      | 小   | 中 | 大 | 0      | 1      | 2     | 3     | 4     | 5      | 小   | 中 | 大 |
| 茶類     | 54                             | せん茶、ほうじ茶、番茶、ウーロン茶、紅茶 など コップ1杯                                                                                                                                                                                                         | 54 | 0              | 1      | 2     | 3     | 4     | 5      | 小              | 中 | 大 | 0      | 1      | 2     | 3          | 4     | 5      | 小   | 中 | 大 | 0      | 1      | 2     | 3     | 4     | 5      | 小   | 中 | 大 |
|        | 55                             | コーヒー(ドリップ・インスタント) カップ1杯  缶コーヒー(無糖) 1本  アイスコーヒー(無糖) コップ 1杯 *糖分子入りコーヒーは除く                                                                                                                                                               | 55 | 0              | 1      | 2     | 3     | 4     | 5      | 小              | 中 | 大 | 0      | 1      | 2     | 3          | 4     | 5      | 小   | 中 | 大 | 0      | 1      | 2     | 3     | 4     | 5      | 小   | 中 | 大 |
| 嗜好品類   | 56                             | スポーツ飲料 グラス1杯 炭酸飲料 グラス1杯 果汁入り飲料 グラス1杯 乳酸飲料 小1本 糖分子入りコーヒー 1缶                                                                                                                                                                            | 56 | 0              | 1      | 2     | 3     | 4     | 5      | 小              | 中 | 大 | 0      | 1      | 2     | 3          | 4     | 5      | 小   | 中 | 大 | 0      | 1      | 2     | 3     | 4     | 5      | 小   | 中 | 大 |
|        | 57                             | うずら豆など 小皿1杯  こんにゃく 小皿1杯  ゆであずき 大さじ1杯強                                                                                                                                                                                                 | 57 | 0              | 1      | 2     | 3     | 4     | 5      | 小              | 中 | 大 | 0      | 1      | 2     | 3          | 4     | 5      | 小   | 中 | 大 | 0      | 1      | 2     | 3     | 4     | 5      | 小   | 中 | 大 |
|        | 58                             | 菓子パン:あんぱん、クリームパン、ジャムパン、メロンパン、チョココロンネ、カレーパン など 1個                                                                                                                                                                                      | 58 | 0              | 1      | 2     | 3     | 4     | 5      | 小              | 中 | 大 | 0      | 1      | 2     | 3          | 4     | 5      | 小   | 中 | 大 | 0      | 1      | 2     | 3     | 4     | 5      | 小   | 中 | 大 |
|        | 59                             | ショートケーキ・チョコレートケーキ  パウンドケーキ 3cm  シュークリーム 1個  パイ・タルト・ドーナツ など 1個                                                                                                                                                                         | 59 | 0              | 1      | 2     | 3     | 4     | 5      | 小              | 中 | 大 | 0      | 1      | 2     | 3          | 4     | 5      | 小   | 中 | 大 | 0      | 1      | 2     | 3     | 4     | 5      | 小   | 中 | 大 |
|        | 60                             | まんじゅう 小1個  カステラ 1cm幅  だらやき・もなか・大福など 1/3個  ようかん 1cm幅                                                                                                                                                                                   | 60 | 0              | 1      | 2     | 3     | 4     | 5      | 小              | 中 | 大 | 0      | 1      | 2     | 3          | 4     | 5      | 小   | 中 | 大 | 0      | 1      | 2     | 3     | 4     | 5      | 小   | 中 | 大 |
|        | 61                             | プリン  ゼリー・ババロア 1個  シャーベット 1個                                                                                                                                                                                                           | 61 | 0              | 1      | 2     | 3     | 4     | 5      | 小              | 中 | 大 | 0      | 1      | 2     | 3          | 4     | 5      | 小   | 中 | 大 | 0      | 1      | 2     | 3     | 4     | 5      | 小   | 中 | 大 |
|        | 62                             | チョコレート 3かけら  チョコ菓子 片手1杯分  シャーベット 1個                                                                                                                                                                                                   | 62 | 0              | 1      | 2     | 3     | 4     | 5      | 小              | 中 | 大 | 0      | 1      | 2     | 3          | 4     | 5      | 小   | 中 | 大 | 0      | 1      | 2     | 3     | 4     | 5      | 小   | 中 | 大 |
|        | 63                             | 揚げせんべい 2枚  かりんとう(黒・白) 3~5本  ポテトチップス・ポップコーン コーンスナック 片手1杯分                                                                                                                                                                              | 63 | 0              | 1      | 2     | 3     | 4     | 5      | 小              | 中 | 大 | 0      | 1      | 2     | 3          | 4     | 5      | 小   | 中 | 大 | 0      | 1      | 2     | 3     | 4     | 5      | 小   | 中 | 大 |
|        | 64                             | あめ、ドロップ 2個  キャラメル 2個  バタースカッチ 2個  ガム 4枚                                                                                                                                                                                               | 64 | 0              | 1      | 2     | 3     | 4     | 5      | 小              | 中 | 大 | 0      | 1      | 2     | 3          | 4     | 5      | 小   | 中 | 大 | 0      | 1      | 2     | 3     | 4     | 5      | 小   | 中 | 大 |
|        | 65                             | カップアイスクリーム 1個  アイスパバー 1本  ソフトクリーム 1個                                                                                                                                                                                                  | 65 | 0              | 1      | 2     | 3     | 4     | 5      | 小              | 中 | 大 | 0      | 1      | 2     | 3          | 4     | 5      | 小   | 中 | 大 | 0      | 1      | 2     | 3     | 4     | 5      | 小   | 中 | 大 |
| 66     | かた焼きせんべい 1枚  2枚入りせんべい  かきもち 2枚 | 66                                                                                                                                                                                                                                    | 0  | 1              | 2      | 3     | 4     | 5     | 小      | 中              | 大 | 0 | 1      | 2      | 3     | 4          | 5     | 小      | 中   | 大 | 0 | 1      | 2      | 3     | 4     | 5     | 小      | 中   | 大 |   |
| 67     | クッキー 2枚  サブレ 1枚  ビスケット 3枚      | 67                                                                                                                                                                                                                                    | 0  | 1              | 2      | 3     | 4     | 5     | 小      | 中              | 大 | 0 | 1      | 2      | 3     | 4          | 5     | 小      | 中   | 大 | 0 | 1      | 2      | 3     | 4     | 5     | 小      | 中   | 大 |   |
| 汁もの    | 68                             | みそ汁 1杯分                                                                                                                                                                                                                               | 68 | 0              | 1      | 2     | 3     | 4     | 5      | 小              | 中 | 大 | 0      | 1      | 2     | 3          | 4     | 5      | 小   | 中 | 大 | 0      | 1      | 2     | 3     | 4     | 5      | 小   | 中 | 大 |
|        | 69                             | すまし汁、野菜スープ、けんちん汁 など 1杯分                                                                                                                                                                                                               | 69 | 0              | 1      | 2     | 3     | 4     | 5      | 小              | 中 | 大 | 0      | 1      | 2     | 3          | 4     | 5      | 小   | 中 | 大 | 0      | 1      | 2     | 3     | 4     | 5      | 小   | 中 | 大 |
|        | 70                             | ポタージュ (カップスープ、インスタントスープを含む) 1人前                                                                                                                                                                                                       | 70 | 0              | 1      | 2     | 3     | 4     | 5      | 小              | 中 | 大 | 0      | 1      | 2     | 3          | 4     | 5      | 小   | 中 | 大 | 0      | 1      | 2     | 3     | 4     | 5      | 小   | 中 | 大 |
| 使った料理  | 71                             | さとう、はちみつ、ジャム など 小さじ1  スティックシュガー(3g) 1本                                                                                                                                                                                                | 71 | 0              | 1      | 2     | 3     | 4     | 5      | 小              | 中 | 大 | 0      | 1      | 2     | 3          | 4     | 5      | 小   | 中 | 大 | 0      | 1      | 2     | 3     | 4     | 5      | 小   | 中 | 大 |
|        | 72                             | 煮物(かぼちゃ、いも類)、きんぴらごぼう など 小鉢1杯                                                                                                                                                                                                          | 72 | 0              | 1      | 2     | 3     | 4     | 5      | 小              | 中 | 大 | 0      | 1      | 2     | 3          | 4     | 5      | 小   | 中 | 大 | 0      | 1      | 2     | 3     | 4     | 5      | 小   | 中 | 大 |
|        | 73                             | 「おひたし」、「おさしみ」などに使うしょうゆやポン酢 小さじ1                                                                                                                                                                                                       | 73 | 0              | 1      | 2     | 3     | 4     | 5      | 小              | 中 | 大 | 0      | 1      | 2     | 3          | 4     | 5      | 小   | 中 | 大 | 0      | 1      | 2     | 3     | 4     | 5      | 小   | 中 | 大 |
|        | 74                             | ソース、ケチャップ 大さじ1                                                                                                                                                                                                                        | 74 | 0              | 1      | 2     | 3     | 4     | 5      | 小              | 中 | 大 | 0      | 1      | 2     | 3          | 4     | 5      | 小   | 中 | 大 | 0      | 1      | 2     | 3     | 4     | 5      | 小   | 中 | 大 |

|                                                               |    | 朝食 (午前中の間食を含む) |                                      |       |                       |       |                 |     |   |   |        | 昼食 (午後中の間食を含む) |       |       |       |        | 夕食 (夜食を含む) |   |   |        |        |       |       |       |        |     |   |   |   |   |   |   |   |   |   |
|---------------------------------------------------------------|----|----------------|--------------------------------------|-------|-----------------------|-------|-----------------|-----|---|---|--------|----------------|-------|-------|-------|--------|------------|---|---|--------|--------|-------|-------|-------|--------|-----|---|---|---|---|---|---|---|---|---|
|                                                               |    | 0              | 1                                    | 2     | 3                     | 4     | 5               | 1回量 |   |   | 0      | 1              | 2     | 3     | 4     | 5      | 1回量        |   |   | 0      | 1      | 2     | 3     | 4     | 5      | 1回量 |   |   |   |   |   |   |   |   |   |
|                                                               |    | 全く食べない         | 月に1~2回                               | 週1~2回 | 週3~4回                 | 週5~6回 | 朝食にいつも          | 小   | 中 | 大 | 全く食べない | 月に1~2回         | 週1~2回 | 週3~4回 | 週5~6回 | 昼食にいつも | 小          | 中 | 大 | 全く食べない | 月に1~2回 | 週1~2回 | 週3~4回 | 週5~6回 | 夕食にいつも | 小   | 中 | 大 |   |   |   |   |   |   |   |
| * 以下の項目は油類の使用頻度についてお聞きしますので、<br>すでにお答えになった料理についても、再度、ご回答願います。 |    | 【「中」の食品例】      |                                      |       |                       |       |                 |     |   |   |        |                |       |       |       |        |            |   |   |        |        |       |       |       |        |     |   |   |   |   |   |   |   |   |   |
| 油脂類                                                           | 75 |                | ピーナッツ・アーモンド・カシューナッツ など 片手1杯          |       | ごま 大さじ1               | 75    | 0               | 1   | 2 | 3 | 4      | 5              | 小     | 中     | 大     | 0      | 1          | 2 | 3 | 4      | 5      | 小     | 中     | 大     | 0      | 1   | 2 | 3 | 4 | 5 | 小 | 中 | 大 |   |   |
|                                                               | 76 |                | カレーライス・ハヤシライス・シチュー など 1人前            |       |                       | 76    | 0               | 1   | 2 | 3 | 4      | 5              | 小     | 中     | 大     | 0      | 1          | 2 | 3 | 4      | 5      | 小     | 中     | 大     | 0      | 1   | 2 | 3 | 4 | 5 | 小 | 中 | 大 |   |   |
|                                                               | 77 |                | フレンチドレッシング・クリーミードレッシング・マヨネーズ など 大さじ1 |       | ポテトサラダ・マカロニサラダなど 小鉢1杯 | 77    | 0               | 1   | 2 | 3 | 4      | 5              | 小     | 中     | 大     | 0      | 1          | 2 | 3 | 4      | 5      | 小     | 中     | 大     | 0      | 1   | 2 | 3 | 4 | 5 | 小 | 中 | 大 |   |   |
|                                                               | 78 |                | ノンオイルドレッシング 大さじ1                     |       |                       | 78    | 0               | 1   | 2 | 3 | 4      | 5              | 小     | 中     | 大     | 0      | 1          | 2 | 3 | 4      | 5      | 小     | 中     | 大     | 0      | 1   | 2 | 3 | 4 | 5 | 小 | 中 | 大 |   |   |
|                                                               | 79 |                | バター・マーガリン 大さじ1                       |       | サンドイッチ 2切れ            |       | 固形バター・マーガリン 1切れ | 79  | 0 | 1 | 2      | 3              | 4     | 5     | 小     | 中      | 大          | 0 | 1 | 2      | 3      | 4     | 5     | 小     | 中      | 大   | 0 | 1 | 2 | 3 | 4 | 5 | 小 | 中 | 大 |
|                                                               | 80 |                | 焼きそば、チャーハン、ビーフン 1人前                  |       |                       | 80    | 0               | 1   | 2 | 3 | 4      | 5              | 小     | 中     | 大     | 0      | 1          | 2 | 3 | 4      | 5      | 小     | 中     | 大     | 0      | 1   | 2 | 3 | 4 | 5 | 小 | 中 | 大 |   |   |
|                                                               | 81 |                | 野菜炒め 中皿1杯分、中国炒めもの 1人前                |       |                       | 81    | 0               | 1   | 2 | 3 | 4      | 5              | 小     | 中     | 大     | 0      | 1          | 2 | 3 | 4      | 5      | 小     | 中     | 大     | 0      | 1   | 2 | 3 | 4 | 5 | 小 | 中 | 大 |   |   |
|                                                               | 82 |                | 天ぷら、フライ、カツ 1人前<br>コロッケ 2個            |       | から揚げ 4個               |       | 冷凍食品 あげ物2個      | 82  | 0 | 1 | 2      | 3              | 4     | 5     | 小     | 中      | 大          | 0 | 1 | 2      | 3      | 4     | 5     | 小     | 中      | 大   | 0 | 1 | 2 | 3 | 4 | 5 | 小 | 中 | 大 |

★ご記入をお願いします

【性別】 男・女

【年齢】 ( ) 歳

【身長】 ( ) cm

【体重】 ( ) kg

【日常生活】 一週間の平均的な日常生活を教えてください。どれか一つに○印をつけてください。

1. 座っている仕事が多い・家にいることが多い
2. 立っている仕事や歩き回る仕事が多い、または20分以上の運動等を週に3回以上行う
3. 頻繁に休まないといけない仕事が多い、または毎日1時間以上の運動を行う

FFQW82( Semi-Quantative Food Frequency Questionnaire W82)

| During the past a month, how frequency did you eat a serving of each of the foods listed here?<br>① The response 6 categories for the frequency: Never, 1~2 per month, 1~2 per week, 3~4 per week, 5~6 per week, Every time<br>Please mark only one ✓ for frequency<br>② The response 3 categories for the portion size:<br>Small (S); less than 0.5 portion size, Medium (M); 1 portion size, Large (L); more than 1.5 portion size<br>You can see "Medium; 1 portion size" as following photograph of each food.<br>Please mark only one ✓ for portion size. If you didn't eat the food, no ✓mark. |            |                                                                               |                                               | Frequency                                                                   |                                                                                    |                             |              |              |           | Breakfast ( including the morning snack) |   |   | Lunch ( including the afternoon snack) |               |              |              |              | Dinner ( including the night snack) |              |   |   |       |               |              |              |              |           |              |   |   |   |  |  |  |
|------------------------------------------------------------------------------------------------------------------------------------------------------------------------------------------------------------------------------------------------------------------------------------------------------------------------------------------------------------------------------------------------------------------------------------------------------------------------------------------------------------------------------------------------------------------------------------------------------|------------|-------------------------------------------------------------------------------|-----------------------------------------------|-----------------------------------------------------------------------------|------------------------------------------------------------------------------------|-----------------------------|--------------|--------------|-----------|------------------------------------------|---|---|----------------------------------------|---------------|--------------|--------------|--------------|-------------------------------------|--------------|---|---|-------|---------------|--------------|--------------|--------------|-----------|--------------|---|---|---|--|--|--|
|                                                                                                                                                                                                                                                                                                                                                                                                                                                                                                                                                                                                      |            |                                                                               |                                               | 0                                                                           | 1                                                                                  | 2                           | 3            | 4            | 5         | portion size                             |   |   | 0                                      | 1             | 2            | 3            | 4            | 5                                   | portion size |   |   | 0     | 1             | 2            | 3            | 4            | 5         | portion size |   |   |   |  |  |  |
| "Medium" 1 portion size (for example)                                                                                                                                                                                                                                                                                                                                                                                                                                                                                                                                                                |            |                                                                               |                                               | Never                                                                       | 1~2 per month                                                                      | 1~2 per week                | 3~4 per week | 5~6 per week | Everytime | S                                        | M | L | Never                                  | 1~2 per month | 1~2 per week | 3~4 per week | 5~6 per week | Everytime                           | S            | M | L | Never | 1~2 per month | 1~2 per week | 3~4 per week | 5~6 per week | Everytime | S            | M | L |   |  |  |  |
| Grains group (included Potatos)                                                                                                                                                                                                                                                                                                                                                                                                                                                                                                                                                                      | 1          | Rice, 1 cup medium                                                            | RICE BALL, 1.5 pieces                         | INARI-SUSHI or FUTOMAKI-SUSHI, 3 pieces                                     | Rice cake, 2 pieces                                                                | 1                           | 0            | 1            | 2         | 3                                        | 4 | 5 |                                        |               |              | 0            | 1            | 2                                   | 3            | 4 | 5 |       |               |              | 0            | 1            | 2         | 3            | 4 | 5 |   |  |  |  |
|                                                                                                                                                                                                                                                                                                                                                                                                                                                                                                                                                                                                      | 2          | Curry and rice or Chinese-style fried rice, 1 portion size                    | Rice of Lunch box or Set meal                 |                                                                             |                                                                                    | 2                           | 0            | 1            | 2         | 3                                        | 4 | 5 |                                        |               |              | 0            | 1            | 2                                   | 3            | 4 | 5 |       |               |              | 0            | 1            | 2         | 3            | 4 | 5 |   |  |  |  |
|                                                                                                                                                                                                                                                                                                                                                                                                                                                                                                                                                                                                      | 3          | NIGIRIZUSHI or KATHUDON, or OYAKODON, 1 portion size                          |                                               |                                                                             |                                                                                    | 3                           | 0            | 1            | 2         | 3                                        | 4 | 5 |                                        |               |              | 0            | 1            | 2                                   | 3            | 4 | 5 |       |               |              | 0            | 1            | 2         | 3            | 4 | 5 |   |  |  |  |
|                                                                                                                                                                                                                                                                                                                                                                                                                                                                                                                                                                                                      | 4          | White bread, one of 6-cutting                                                 | Soft rolls, 2 pieces                          | French bread, 3 pieces                                                      | Sandwich, 2 cuts                                                                   | 4                           | 0            | 1            | 2         | 3                                        | 4 | 5 |                                        |               |              | 0            | 1            | 2                                   | 3            | 4 | 5 |       |               |              | 0            | 1            | 2         | 3            | 4 | 5 |   |  |  |  |
|                                                                                                                                                                                                                                                                                                                                                                                                                                                                                                                                                                                                      | 5          | UDON or SOBA, 1 portion size                                                  | SOMEN, 1 portion size                         |                                                                             |                                                                                    | 5                           | 0            | 1            | 2         | 3                                        | 4 | 5 |                                        |               |              | 0            | 1            | 2                                   | 3            | 4 | 5 |       |               |              | 0            | 1            | 2         | 3            | 4 | 5 |   |  |  |  |
|                                                                                                                                                                                                                                                                                                                                                                                                                                                                                                                                                                                                      | 6          | Chinese noodles or YAKISOBA, 1 portion size                                   | Instant chinese noodles, 1 portion size       | Instant chinese noodles packed in cups, 1 portion                           |                                                                                    | 6                           | 0            | 1            | 2         | 3                                        | 4 | 5 |                                        |               |              | 0            | 1            | 2                                   | 3            | 4 | 5 |       |               |              | 0            | 1            | 2         | 3            | 4 | 5 |   |  |  |  |
|                                                                                                                                                                                                                                                                                                                                                                                                                                                                                                                                                                                                      | 7          | Pasta(Spaghetti and Penne), 1 portion size                                    |                                               |                                                                             |                                                                                    | 7                           | 0            | 1            | 2         | 3                                        | 4 | 5 |                                        |               |              | 0            | 1            | 2                                   | 3            | 4 | 5 |       |               |              | 0            | 1            | 2         | 3            | 4 | 5 |   |  |  |  |
|                                                                                                                                                                                                                                                                                                                                                                                                                                                                                                                                                                                                      | 8          | Potatoes, 1 portion size                                                      | Taro, 3 of medium size                        | Sweet potato, 1/3 of medium size                                            | NIKUZYAGA, 1 portion                                                               | Potato salad or Croquettes, | 8            | 0            | 1         | 2                                        | 3 | 4 | 5                                      |               |              |              | 0            | 1                                   | 2            | 3 | 4 | 5     |               |              |              | 0            | 1         | 2            | 3 | 4 | 5 |  |  |  |
|                                                                                                                                                                                                                                                                                                                                                                                                                                                                                                                                                                                                      | 9          | Cornflakes, 1 portion size                                                    |                                               |                                                                             |                                                                                    | 9                           | 0            | 1            | 2         | 3                                        | 4 | 5 |                                        |               |              | 0            | 1            | 2                                   | 3            | 4 | 5 |       |               |              | 0            | 1            | 2         | 3            | 4 | 5 |   |  |  |  |
|                                                                                                                                                                                                                                                                                                                                                                                                                                                                                                                                                                                                      | 10         | Pizza 1 portion size                                                          | Pancake 2 portion size                        | OKONOMIYAKI, 1 sheet or TAKOYAKI, 8 items                                   | Macaroni salad 1 cup small bowl                                                    | 10                          | 0            | 1            | 2         | 3                                        | 4 | 5 |                                        |               |              | 0            | 1            | 2                                   | 3            | 4 | 5 |       |               |              | 0            | 1            | 2         | 3            | 4 | 5 |   |  |  |  |
|                                                                                                                                                                                                                                                                                                                                                                                                                                                                                                                                                                                                      | 11         | JIAOZI(Chinese meat dumpling), 5 items                                        | SHUMA(Chinese meat dumpling), 3 large items   | HARUMAKI, 2 items                                                           | Outer steamed wheat dough of JIAOZI and SHUMA or                                   | 11                          | 0            | 1            | 2         | 3                                        | 4 | 5 |                                        |               |              | 0            | 1            | 2                                   | 3            | 4 | 5 |       |               |              | 0            | 1            | 2         | 3            | 4 | 5 |   |  |  |  |
| Seafood group                                                                                                                                                                                                                                                                                                                                                                                                                                                                                                                                                                                        | 12         | SHIOZAKE (salted salmon) 1 piece                                              | Horse mackerel, HIRAKIBOSHI                   | Atka mackerel, HIRAKIBOSHI (salted)                                         |                                                                                    | 12                          | 0            | 1            | 2         | 3                                        | 4 | 5 |                                        |               |              | 0            | 1            | 2                                   | 3            | 4 | 5 |       |               |              | 0            | 1            | 2         | 3            | 4 | 5 |   |  |  |  |
|                                                                                                                                                                                                                                                                                                                                                                                                                                                                                                                                                                                                      | 13         | Horse ackerel, TATAKI, 1                                                      | Sea bream or olive flounder (raw), SASHIMI, 5 | Swordfish-Cod-Righteye flounder                                             |                                                                                    | 13                          | 0            | 1            | 2         | 3                                        | 4 | 5 |                                        |               |              | 0            | 1            | 2                                   | 3            | 4 | 5 |       |               |              | 0            | 1            | 2         | 3            | 4 | 5 |   |  |  |  |
|                                                                                                                                                                                                                                                                                                                                                                                                                                                                                                                                                                                                      | 14         | Pacific saury, 1/2 portion                                                    | Mackerel, 1/4 portion                         | Yellowtail-Japanese Spanish mackerel, 1 piece                               | Sardine, 1 portion                                                                 | SASHIMI, 4 pieces           | 14           | 0            | 1         | 2                                        | 3 | 4 | 5                                      |               |              |              | 0            | 1                                   | 2            | 3 | 4 | 5     |               |              |              | 0            | 1         | 2            | 3 | 4 | 5 |  |  |  |
|                                                                                                                                                                                                                                                                                                                                                                                                                                                                                                                                                                                                      | 15         | Kuruma prawn, 4 portion size                                                  | Japanese common squid, 1/4 portion size       | Common octopus, 1 portion size                                              |                                                                                    | 15                          | 0            | 1            | 2         | 3                                        | 4 | 5 |                                        |               |              | 0            | 1            | 2                                   | 3            | 4 | 5 |       |               |              | 0            | 1            | 2         | 3            | 4 | 5 |   |  |  |  |
|                                                                                                                                                                                                                                                                                                                                                                                                                                                                                                                                                                                                      | 16         | Giant ezo-scallop, adductor muscle, 2                                         | Short-necked clam, 10~12 pieces               | Miso soup of Japanese corbicula                                             | Pacific oyster 3 pieces                                                            | 16                          | 0            | 1            | 2         | 3                                        | 4 | 5 |                                        |               |              | 0            | 1            | 2                                   | 3            | 4 | 5 |       |               |              | 0            | 1            | 2         | 3            | 4 | 5 |   |  |  |  |
|                                                                                                                                                                                                                                                                                                                                                                                                                                                                                                                                                                                                      | 17         | Sardine, SHIRASUBOSHI (boiled Walleye pollock, and dried whitebait), 2 spoons | TARAKO (salted) 1/2                           | Chum salmon, IKURA 2 large spoons                                           | Algae, TSUKUDANI (simmered in soy sauce and sugar), 1 large                        | 17                          | 0            | 1            | 2         | 3                                        | 4 | 5 |                                        |               |              | 0            | 1            | 2                                   | 3            | 4 | 5 |       |               |              | 0            | 1            | 2         | 3            | 4 | 5 |   |  |  |  |
|                                                                                                                                                                                                                                                                                                                                                                                                                                                                                                                                                                                                      | 18         | Surimi products, MUSHI-KAMABOKO,                                              | Surimi products, YAKI-CHIKUWA, 1 piece        | Surimi products, SATSUMA-AGE, 1 piece                                       |                                                                                    | 18                          | 0            | 1            | 2         | 3                                        | 4 | 5 |                                        |               |              | 0            | 1            | 2                                   | 3            | 4 | 5 |       |               |              | 0            | 1            | 2         | 3            | 4 | 5 |   |  |  |  |
|                                                                                                                                                                                                                                                                                                                                                                                                                                                                                                                                                                                                      | 19         | Tuna, canned products (small), 1/2 can                                        | Mackerel, canned products, 1/3 can            | Pacific saury (canned products) or Japanese pilchard (canned products), 1/2 |                                                                                    | 19                          | 0            | 1            | 2         | 3                                        | 4 | 5 |                                        |               |              | 0            | 1            | 2                                   | 3            | 4 | 5 |       |               |              | 0            | 1            | 2         | 3            | 4 | 5 |   |  |  |  |
|                                                                                                                                                                                                                                                                                                                                                                                                                                                                                                                                                                                                      | Meat group | 20                                                                            | Pork, SHOGAYAK, 1,3 pieces                    | Pork, TONKATU, 1/2 pieces                                                   | Pork stew, 1 cup small                                                             | Stir-fried pork vegetables, | 20           | 0            | 1         | 2                                        | 3 | 4 | 5                                      |               |              |              | 0            | 1                                   | 2            | 3 | 4 | 5     |               |              |              | 0            | 1         | 2            | 3 | 4 | 5 |  |  |  |
| 21                                                                                                                                                                                                                                                                                                                                                                                                                                                                                                                                                                                                   |            | Chicken (thigh, breast) 1/2 piece                                             | Fried chicken, 3 pieces                       | Chicken, YAKITORI, 2 skewers                                                | Chicken stew, 1 cup small bowl                                                     | 21                          | 0            | 1            | 2         | 3                                        | 4 | 5 |                                        |               |              | 0            | 1            | 2                                   | 3            | 4 | 5 |       |               |              | 0            | 1            | 2         | 3            | 4 | 5 |   |  |  |  |
| 22                                                                                                                                                                                                                                                                                                                                                                                                                                                                                                                                                                                                   |            | Beef steak, 1/2 piece                                                         | Beef, GYUDON, 1 Beef Stew                     | Beef Stew, 1 portion                                                        | Beef thin slice, 2 pieces                                                          |                             | 22           | 0            | 1         | 2                                        | 3 | 4 | 5                                      |               |              |              | 0            | 1                                   | 2            | 3 | 4 | 5     |               |              |              | 0            | 1         | 2            | 3 | 4 | 5 |  |  |  |
| 23                                                                                                                                                                                                                                                                                                                                                                                                                                                                                                                                                                                                   |            | Hamburger, 1 portion size                                                     | Meatball, 3                                   | Mince cutlet, 1 piece                                                       | Meat sauce and other mince dish, 1 portion size                                    | 23                          | 0            | 1            | 2         | 3                                        | 4 | 5 |                                        |               |              | 0            | 1            | 2                                   | 3            | 4 | 5 |       |               |              | 0            | 1            | 2         | 3            | 4 | 5 |   |  |  |  |
| 24                                                                                                                                                                                                                                                                                                                                                                                                                                                                                                                                                                                                   |            | Pork ham (loin)                                                               | Pork sausage (Vienna),                        | Pork bacon 2 pieces                                                         | Please think about meat and minced meat such as stew, stir-fried vegetables, soup. | 24                          | 0            | 1            | 2         | 3                                        | 4 | 5 |                                        |               |              | 0            | 1            | 2                                   | 3            | 4 | 5 |       |               |              | 0            | 1            | 2         | 3            | 4 | 5 |   |  |  |  |
| 25                                                                                                                                                                                                                                                                                                                                                                                                                                                                                                                                                                                                   |            | YAKITORI (liver, tongue, heart)                                               | MOTUNI, 1 portion size                        |                                                                             |                                                                                    | 25                          | 0            | 1            | 2         | 3                                        | 4 | 5 |                                        |               |              | 0            | 1            | 2                                   | 3            | 4 | 5 |       |               |              | 0            | 1            | 2         | 3            | 4 | 5 |   |  |  |  |



FFQW82( Semi-Quantative Food Frequency Questionnaire W82)

| During the past a month, how frequency did you eat a serving of each of the foods listed here?<br>① The response 6 categories for the frequency: Never, 1~2 per month, 1~2 per week, 3~4 per week, 5~6 per week, Every time<br>Please mark only one ✓ for frequency<br>② The response 3 categories for the portion size:<br>Small (S); less than 0.5 portion size, Medium (M); 1 portion size, Large (L); more than 1.5 portion size<br>You can see "Medium; 1 portion size" as following photograph of each food.<br>Please mark only one ✓ for portion size. If you didn't eat the food, no ✓mark. |                                                                                               |                                                                                                                                                                |                                                                                                                   | Breakfast ( including the morning snack)                                                                                       |                                                                                                                  |                                                                                                                      |              |              |           | Lunch ( including the afternoon snack) |   |   |              |               |              | Dinner ( including the night snack) |              |           |              |   |   |       |               |              |              |              |           |   |   |   |   |   |   |   |   |   |   |   |  |  |  |  |  |  |
|------------------------------------------------------------------------------------------------------------------------------------------------------------------------------------------------------------------------------------------------------------------------------------------------------------------------------------------------------------------------------------------------------------------------------------------------------------------------------------------------------------------------------------------------------------------------------------------------------|-----------------------------------------------------------------------------------------------|----------------------------------------------------------------------------------------------------------------------------------------------------------------|-------------------------------------------------------------------------------------------------------------------|--------------------------------------------------------------------------------------------------------------------------------|------------------------------------------------------------------------------------------------------------------|----------------------------------------------------------------------------------------------------------------------|--------------|--------------|-----------|----------------------------------------|---|---|--------------|---------------|--------------|-------------------------------------|--------------|-----------|--------------|---|---|-------|---------------|--------------|--------------|--------------|-----------|---|---|---|---|---|---|---|---|---|---|---|--|--|--|--|--|--|
|                                                                                                                                                                                                                                                                                                                                                                                                                                                                                                                                                                                                      |                                                                                               |                                                                                                                                                                |                                                                                                                   | Frequency                                                                                                                      |                                                                                                                  |                                                                                                                      |              |              |           | portion size                           |   |   | portion size |               |              | portion size                        |              |           | portion size |   |   |       |               |              |              |              |           |   |   |   |   |   |   |   |   |   |   |   |  |  |  |  |  |  |
|                                                                                                                                                                                                                                                                                                                                                                                                                                                                                                                                                                                                      |                                                                                               |                                                                                                                                                                |                                                                                                                   | 0                                                                                                                              | 1                                                                                                                | 2                                                                                                                    | 3            | 4            | 5         | S                                      | M | L | S            | M             | L            | S                                   | M            | L         | S            | M | L |       |               |              |              |              |           |   |   |   |   |   |   |   |   |   |   |   |  |  |  |  |  |  |
| <b>"Medium" 1 portion size (for example)</b>                                                                                                                                                                                                                                                                                                                                                                                                                                                                                                                                                         |                                                                                               |                                                                                                                                                                |                                                                                                                   | Never                                                                                                                          | 1~2 per month                                                                                                    | 1~2 per week                                                                                                         | 3~4 per week | 5~6 per week | Everytime | S                                      | M | L | Never        | 1~2 per month | 1~2 per week | 3~4 per week                        | 5~6 per week | Everytime | S            | M | L | Never | 1~2 per month | 1~2 per week | 3~4 per week | 5~6 per week | Everytime | S | M | L |   |   |   |   |   |   |   |   |  |  |  |  |  |  |
| Alcohol                                                                                                                                                                                                                                                                                                                                                                                                                                                                                                                                                                                              | 50                                                                                            |  can of beer<br>1 cans(500ml)                                                 |                                                                                                                   | 50                                                                                                                             | 0                                                                                                                | 1                                                                                                                    | 2            | 3            | 4         | 5                                      |   |   |              |               |              |                                     | 0            | 1         | 2            | 3 | 4 | 5     |               |              |              |              |           |   | 0 | 1 | 2 | 3 | 4 | 5 |   |   |   |   |  |  |  |  |  |  |
|                                                                                                                                                                                                                                                                                                                                                                                                                                                                                                                                                                                                      | 51                                                                                            |  Sake<br>(180ml)                                                              |                                                                                                                   | 51                                                                                                                             | 0                                                                                                                | 1                                                                                                                    | 2            | 3            | 4         | 5                                      |   |   |              |               |              |                                     | 0            | 1         | 2            | 3 | 4 | 5     |               |              |              |              |           |   | 0 | 1 | 2 | 3 | 4 | 5 |   |   |   |   |  |  |  |  |  |  |
|                                                                                                                                                                                                                                                                                                                                                                                                                                                                                                                                                                                                      | 52                                                                                            |  wine<br>1 glass                                                              |                                                                                                                   | 52                                                                                                                             | 0                                                                                                                | 1                                                                                                                    | 2            | 3            | 4         | 5                                      |   |   |              |               |              |                                     | 0            | 1         | 2            | 3 | 4 | 5     |               |              |              |              |           |   | 0 | 1 | 2 | 3 | 4 | 5 |   |   |   |   |  |  |  |  |  |  |
| Tea group                                                                                                                                                                                                                                                                                                                                                                                                                                                                                                                                                                                            | 53                                                                                            |  Distilled spirits 1/4 glass<br>Shochu hot water allocation                   |  Canned sour<br>1 glass          |  whiskey<br>single 1 cup                      |  plum wine<br>1 glass           | 1 glass = 200ml                                                                                                      |              | 53           | 0         | 1                                      | 2 | 3 | 4            | 5             |              |                                     |              |           |              |   | 0 | 1     | 2             | 3            | 4            | 5            |           |   |   |   |   |   | 0 | 1 | 2 | 3 | 4 | 5 |  |  |  |  |  |  |
|                                                                                                                                                                                                                                                                                                                                                                                                                                                                                                                                                                                                      | 54                                                                                            | green tea: sencha·hoji-cha·ban-cha·<br>oolong tea· black tea, 1glass                                                                                           |                                                                                                                   |                                                                                                                                |                                                                                                                  |                                                                                                                      |              | 54           | 0         | 1                                      | 2 | 3 | 4            | 5             |              |                                     |              |           |              |   | 0 | 1     | 2             | 3            | 4            | 5            |           |   |   |   |   |   | 0 | 1 | 2 | 3 | 4 | 5 |  |  |  |  |  |  |
|                                                                                                                                                                                                                                                                                                                                                                                                                                                                                                                                                                                                      | 55                                                                                            |  coffee<br>1 glass                                                            | Canned coffee(sugar-free) 1 cans<br>iced coffee(sugar-free) 1 glass                                               |                                                                                                                                |                                                                                                                  |                                                                                                                      |              | 55           | 0         | 1                                      | 2 | 3 | 4            | 5             |              |                                     |              |           |              |   | 0 | 1     | 2             | 3            | 4            | 5            |           |   |   |   |   |   | 0 | 1 | 2 | 3 | 4 | 5 |  |  |  |  |  |  |
|                                                                                                                                                                                                                                                                                                                                                                                                                                                                                                                                                                                                      | 56                                                                                            |  sport drink<br>1 glass                                                       |  carbonated drink<br>1 glass     |  soft drinks<br>containing fruit              |  a lactic acid drink<br>1 glass |  coffee containing sugar<br>1 cans |              | 56           | 0         | 1                                      | 2 | 3 | 4            | 5             |              |                                     |              |           |              |   | 0 | 1     | 2             | 3            | 4            | 5            |           |   |   |   |   |   | 0 | 1 | 2 | 3 | 4 | 5 |  |  |  |  |  |  |
|                                                                                                                                                                                                                                                                                                                                                                                                                                                                                                                                                                                                      | 57                                                                                            |  UZURAMAME<br>1 portion size                                                  |  KONBUMAME<br>1 portion size     |  red beans<br>1 table spoon                   |                                                                                                                  |                                                                                                                      |              | 57           | 0         | 1                                      | 2 | 3 | 4            | 5             |              |                                     |              |           |              |   | 0 | 1     | 2             | 3            | 4            | 5            |           |   |   |   |   |   | 0 | 1 | 2 | 3 | 4 | 5 |  |  |  |  |  |  |
|                                                                                                                                                                                                                                                                                                                                                                                                                                                                                                                                                                                                      | 58                                                                                            | 1 sweet bun(ann bun·cream bun·jam bun·meron bun·chokokorone·curry bun)                                                                                         |                                                                                                                   |                                                                                                                                |                                                                                                                  |                                                                                                                      |              | 58           | 0         | 1                                      | 2 | 3 | 4            | 5             |              |                                     |              |           |              |   | 0 | 1     | 2             | 3            | 4            | 5            |           |   |   |   |   |   | 0 | 1 | 2 | 3 | 4 | 5 |  |  |  |  |  |  |
|                                                                                                                                                                                                                                                                                                                                                                                                                                                                                                                                                                                                      | 59                                                                                            |  1 shortcake·chocolate cake<br>pie·tart·donut                                 |  Pound Cake<br>thickness of 3 cm |  1 Cream puff                                 |                                                                                                                  |                                                                                                                      |              | 59           | 0         | 1                                      | 2 | 3 | 4            | 5             |              |                                     |              |           |              |   | 0 | 1     | 2             | 3            | 4            | 5            |           |   |   |   |   |   | 0 | 1 | 2 | 3 | 4 | 5 |  |  |  |  |  |  |
|                                                                                                                                                                                                                                                                                                                                                                                                                                                                                                                                                                                                      | 60                                                                                            |  1 MANJYUU<br>YOUKAN: thickness of 1                                          |  CASTELLA<br>thickness of 1 cm   | DORAYAKI·MONAKA·DAIHUKU<br>One third                                                                                           |                                                                                                                  |                                                                                                                      |              | 60           | 0         | 1                                      | 2 | 3 | 4            | 5             |              |                                     |              |           |              |   | 0 | 1     | 2             | 3            | 4            | 5            |           |   |   |   |   |   | 0 | 1 | 2 | 3 | 4 | 5 |  |  |  |  |  |  |
|                                                                                                                                                                                                                                                                                                                                                                                                                                                                                                                                                                                                      | 61                                                                                            |  1 pudding<br>小1個                                                             |  1 jelly·bavarian cream          | 1 sherbet                                                                                                                      |                                                                                                                  |                                                                                                                      |              | 61           | 0         | 1                                      | 2 | 3 | 4            | 5             |              |                                     |              |           |              |   | 0 | 1     | 2             | 3            | 4            | 5            |           |   |   |   |   |   | 0 | 1 | 2 | 3 | 4 | 5 |  |  |  |  |  |  |
|                                                                                                                                                                                                                                                                                                                                                                                                                                                                                                                                                                                                      | 62                                                                                            |  chocolate<br>3 pieces                                                        |  chocolate<br>confectionery      |                                                                                                                                |                                                                                                                  |                                                                                                                      |              | 62           | 0         | 1                                      | 2 | 3 | 4            | 5             |              |                                     |              |           |              |   | 0 | 1     | 2             | 3            | 4            | 5            |           |   |   |   |   |   | 0 | 1 | 2 | 3 | 4 | 5 |  |  |  |  |  |  |
|                                                                                                                                                                                                                                                                                                                                                                                                                                                                                                                                                                                                      | 63                                                                                            |  2 fried rice<br>crackers                                                     |  KARINTOU(black·<br>white)       |  Crisps·popcorn·Corn snack<br>One hand 1 cups |                                                                                                                  |                                                                                                                      |              | 63           | 0         | 1                                      | 2 | 3 | 4            | 5             |              |                                     |              |           |              |   | 0 | 1     | 2             | 3            | 4            | 5            |           |   |   |   |   |   | 0 | 1 | 2 | 3 | 4 | 5 |  |  |  |  |  |  |
|                                                                                                                                                                                                                                                                                                                                                                                                                                                                                                                                                                                                      | 64                                                                                            | 2 ames·candies                                                                                                                                                 | 2 caramels                                                                                                        | 2 butterscotches                                                                                                               |                                                                                                                  |                                                                                                                      |              | 64           | 0         | 1                                      | 2 | 3 | 4            | 5             |              |                                     |              |           |              |   | 0 | 1     | 2             | 3            | 4            | 5            |           |   |   |   |   |   | 0 | 1 | 2 | 3 | 4 | 5 |  |  |  |  |  |  |
|                                                                                                                                                                                                                                                                                                                                                                                                                                                                                                                                                                                                      | 65                                                                                            |  1 cup ice cream                                                             |  1 ice bar                      | 1 soft cream                                                                                                                   |                                                                                                                  |                                                                                                                      |              | 65           | 0         | 1                                      | 2 | 3 | 4            | 5             |              |                                     |              |           |              |   | 0 | 1     | 2             | 3            | 4            | 5            |           |   |   |   |   |   | 0 | 1 | 2 | 3 | 4 | 5 |  |  |  |  |  |  |
|                                                                                                                                                                                                                                                                                                                                                                                                                                                                                                                                                                                                      | 66                                                                                            |  1 hard baked rice<br>cracker                                               |  2 rice crackers               |  2 KAKIMOTIS                                |                                                                                                                  |                                                                                                                      |              | 66           | 0         | 1                                      | 2 | 3 | 4            | 5             |              |                                     |              |           |              |   | 0 | 1     | 2             | 3            | 4            | 5            |           |   |   |   |   |   | 0 | 1 | 2 | 3 | 4 | 5 |  |  |  |  |  |  |
| 67                                                                                                                                                                                                                                                                                                                                                                                                                                                                                                                                                                                                   |  2 cookies |  1 sabouret                                                                 | 3 biscuits                                                                                                        |                                                                                                                                |                                                                                                                  |                                                                                                                      | 67           | 0            | 1         | 2                                      | 3 | 4 | 5            |               |              |                                     |              |           |              | 0 | 1 | 2     | 3             | 4            | 5            |              |           |   |   |   |   | 0 | 1 | 2 | 3 | 4 | 5 |   |  |  |  |  |  |  |
| soup                                                                                                                                                                                                                                                                                                                                                                                                                                                                                                                                                                                                 | 68                                                                                            |  Miso soup<br>1 portion size                                                |                                                                                                                   |                                                                                                                                |                                                                                                                  |                                                                                                                      | 68           | 0            | 1         | 2                                      | 3 | 4 | 5            |               |              |                                     |              |           |              | 0 | 1 | 2     | 3             | 4            | 5            |              |           |   |   |   |   | 0 | 1 | 2 | 3 | 4 | 5 |   |  |  |  |  |  |  |
|                                                                                                                                                                                                                                                                                                                                                                                                                                                                                                                                                                                                      | 69                                                                                            |  Sumasi soup·vegetable soup·Kentin soup<br>1 portion size                   |                                                                                                                   |                                                                                                                                |                                                                                                                  |                                                                                                                      | 69           | 0            | 1         | 2                                      | 3 | 4 | 5            |               |              |                                     |              |           |              | 0 | 1 | 2     | 3             | 4            | 5            |              |           |   |   |   |   | 0 | 1 | 2 | 3 | 4 | 5 |   |  |  |  |  |  |  |
|                                                                                                                                                                                                                                                                                                                                                                                                                                                                                                                                                                                                      | 70                                                                                            |  Potage·Instant soup<br>1 portion size                                      |                                                                                                                   |                                                                                                                                |                                                                                                                  |                                                                                                                      | 70           | 0            | 1         | 2                                      | 3 | 4 | 5            |               |              |                                     |              |           |              | 0 | 1 | 2     | 3             | 4            | 5            |              |           |   |   |   |   | 0 | 1 | 2 | 3 | 4 | 5 |   |  |  |  |  |  |  |
| Dishes made with sugar and soy sauce                                                                                                                                                                                                                                                                                                                                                                                                                                                                                                                                                                 | 71                                                                                            |  sugar·honey·jam<br>one teaspoon                                            |  stick sugar<br>1 piece (3g)   | Canned coffee containing sugar<br>half size                                                                                    |                                                                                                                  |                                                                                                                      | 71           | 0            | 1         | 2                                      | 3 | 4 | 5            |               |              |                                     |              |           |              | 0 | 1 | 2     | 3             | 4            | 5            |              |           |   |   |   |   | 0 | 1 | 2 | 3 | 4 | 5 |   |  |  |  |  |  |  |
|                                                                                                                                                                                                                                                                                                                                                                                                                                                                                                                                                                                                      | 72                                                                                            |  Cooked food(pumpkin·Potatoes)·<br>KINPIRAGOBOU                             |                                                                                                                   |                                                                                                                                |                                                                                                                  |                                                                                                                      | 72           | 0            | 1         | 2                                      | 3 | 4 | 5            |               |              |                                     |              |           |              | 0 | 1 | 2     | 3             | 4            | 5            |              |           |   |   |   |   | 0 | 1 | 2 | 3 | 4 | 5 |   |  |  |  |  |  |  |
|                                                                                                                                                                                                                                                                                                                                                                                                                                                                                                                                                                                                      | 73                                                                                            |  Over soy sauce·Ponzu sauce for vegetables boiled or Sasimi<br>one teaspoon |                                                                                                                   |                                                                                                                                |                                                                                                                  |                                                                                                                      | 73           | 0            | 1         | 2                                      | 3 | 4 | 5            |               |              |                                     |              |           |              | 0 | 1 | 2     | 3             | 4            | 5            |              |           |   |   |   |   | 0 | 1 | 2 | 3 | 4 | 5 |   |  |  |  |  |  |  |
|                                                                                                                                                                                                                                                                                                                                                                                                                                                                                                                                                                                                      | 74                                                                                            |  source·ketchup<br>one tablespoon                                           |                                                                                                                   |                                                                                                                                |                                                                                                                  |                                                                                                                      | 74           | 0            | 1         | 2                                      | 3 | 4 | 5            |               |              |                                     |              |           |              | 0 | 1 | 2     | 3             | 4            | 5            |              |           |   |   |   |   | 0 | 1 | 2 | 3 | 4 | 5 |   |  |  |  |  |  |  |



FFQW82( Semi-Quantative Food Frequency Questionnaire W82)

※ The next food lists are questionnaires for frequency of use of fats and oils. Please answer again cuisines that you already answered the questions.

“Medium” 1 portion size (for example)

|               | Frequency | Breakfast (including the morning snack)                                                                                                               |                                                                                                                                 |                                                                                                                    |              |              |           |              |   |   | Lunch (including the afternoon snack) |               |              |              |              | Dinner (including the night snack) |              |   |   |       |               |              |              |              |           |              |   |   |   |  |  |  |
|---------------|-----------|-------------------------------------------------------------------------------------------------------------------------------------------------------|---------------------------------------------------------------------------------------------------------------------------------|--------------------------------------------------------------------------------------------------------------------|--------------|--------------|-----------|--------------|---|---|---------------------------------------|---------------|--------------|--------------|--------------|------------------------------------|--------------|---|---|-------|---------------|--------------|--------------|--------------|-----------|--------------|---|---|---|--|--|--|
|               |           | 0                                                                                                                                                     | 1                                                                                                                               | 2                                                                                                                  | 3            | 4            | 5         | portion size |   |   | 0                                     | 1             | 2            | 3            | 4            | 5                                  | portion size |   |   | 0     | 1             | 2            | 3            | 4            | 5         | portion size |   |   |   |  |  |  |
|               |           | Never                                                                                                                                                 | 1~2 per month                                                                                                                   | 1~2 per week                                                                                                       | 3~4 per week | 5~6 per week | Everytime | S            | M | L | Never                                 | 1~2 per month | 1~2 per week | 3~4 per week | 5~6 per week | Everytime                          | S            | M | L | Never | 1~2 per month | 1~2 per week | 3~4 per week | 5~6 per week | Everytime | S            | M | L |   |  |  |  |
| Fats and oils | 75        |  Peanuts·Almond·Cashew nuts<br>One hand 1 cup                        |  Sesame<br>one tablespoon                      | 75                                                                                                                 | 0            | 1            | 2         | 3            | 4 | 5 |                                       |               |              | 0            | 1            | 2                                  | 3            | 4 | 5 |       |               |              | 0            | 1            | 2         | 3            | 4 | 5 |   |  |  |  |
|               | 76        |  Curry and rice·Hayashi rice·Stew<br>1 portion size                  |                                                                                                                                 | 76                                                                                                                 | 0            | 1            | 2         | 3            | 4 | 5 |                                       |               |              | 0            | 1            | 2                                  | 3            | 4 | 5 |       |               |              | 0            | 1            | 2         | 3            | 4 | 5 |   |  |  |  |
|               | 77        |  Mayonnaise·dressing<br>one tablespoon                               |  Potato salad·Macaroni salad<br>1 portion size | 77                                                                                                                 | 0            | 1            | 2         | 3            | 4 | 5 |                                       |               |              | 0            | 1            | 2                                  | 3            | 4 | 5 |       |               |              | 0            | 1            | 2         | 3            | 4 | 5 |   |  |  |  |
|               | 78        |  Non-oil dressing<br>one tablespoon                                  |                                                                                                                                 | 78                                                                                                                 | 0            | 1            | 2         | 3            | 4 | 5 |                                       |               |              | 0            | 1            | 2                                  | 3            | 4 | 5 |       |               |              | 0            | 1            | 2         | 3            | 4 | 5 |   |  |  |  |
|               | 79        |  Butter·Margarine<br>one tablespoon                                  |  Butter·Margarine<br>one piece                 |  Toast·Sandwich<br>1 portion size | 79           | 0            | 1         | 2            | 3 | 4 | 5                                     |               |              |              | 0            | 1                                  | 2            | 3 | 4 | 5     |               |              |              | 0            | 1         | 2            | 3 | 4 | 5 |  |  |  |
|               | 80        |  Fried noodles·Fried Rice·Stir-fried rice<br>noodles                 |                                                                                                                                 | 80                                                                                                                 | 0            | 1            | 2         | 3            | 4 | 5 |                                       |               |              | 0            | 1            | 2                                  | 3            | 4 | 5 |       |               |              | 0            | 1            | 2         | 3            | 4 | 5 |   |  |  |  |
|               | 81        |  Fried vegetables 1portion size<br>Chinese-style fried 1portion size |                                                                                                                                 | 81                                                                                                                 | 0            | 1            | 2         | 3            | 4 | 5 |                                       |               |              | 0            | 1            | 2                                  | 3            | 4 | 5 |       |               |              | 0            | 1            | 2         | 3            | 4 | 5 |   |  |  |  |
|               | 82        |  Tenpura·Fried food 1portion<br>size                                 |  Fried<br>chikin                               |  Fried frozen food<br>2 pieces    | 82           | 0            | 1         | 2            | 3 | 4 | 5                                     |               |              |              | 0            | 1                                  | 2            | 3 | 4 | 5     |               |              |              | 0            | 1         | 2            | 3 | 4 | 5 |  |  |  |
