# Supplementary material for: Effect of School-Based Home-Collaborative Lifestyle Education on Reducing Subjective Psychosomatic Symptoms in Adolescents: A Cluster Randomised Controlled Trial
Source: PubMed Central journal article supplement (PMC5079616; doi:10.1371/journal.pone.0165285), 2016-10-25
Supplement: pone.0165285.s005.pdf [file pone.0165285.s005.pdf]

**S1 Table. Mean change of the SPS score from baseline at 6 months (intervention effect on primary outcome) by multiple imputation.**

| <b>Total</b>   | <b>ITT/MI (n = 1,509)</b> |           |               |        |                |
|----------------|---------------------------|-----------|---------------|--------|----------------|
|                | <b>Difference</b>         | <b>SE</b> | <b>95% CI</b> |        | <b>P-value</b> |
| <b>Model 1</b> | -1.02                     | 0.48      | -2.05         | -0.003 | 0.049          |
| <b>Model 2</b> | -0.78                     | 0.47      | -1.78         | 0.22   | 0.118          |
| <b>Model 3</b> | -0.79                     | 0.49      | -1.84         | 0.28   | 0.131          |

SPS, subjective psychosomatic symptoms; ITT/MI, Analysis by intention-to-treat principles using multiple imputation (number of imputations = 200); SE, standard error; Model 1, crude mixed model; Model 2, mixed model adjusted for baseline; Model 3, mixed model adjusted for baseline, sex, age, and BMI.
