# Supplementary material for: Effect of School-Based Home-Collaborative Lifestyle Education on Reducing Subjective Psychosomatic Symptoms in Adolescents: A Cluster Randomised Controlled Trial
Source: PubMed Central journal article supplement (PMC5079616; doi:10.1371/journal.pone.0165285), 2016-10-25
Supplement: pone.0165285.s006.pdf [file pone.0165285.s006.pdf]

**S2 Table. Secondary analysis: Mean change of the SPS-D score from baseline at 6 months for ITT/LOCF (intervention effect on primary outcome).**

| SPS-D score | ITT/LOCF (n = 1,509) |           |        |       |         |
|-------------|----------------------|-----------|--------|-------|---------|
|             | Difference           | <i>SE</i> | 95% CI |       | P-value |
| Model 1     | -0.53                | 0.18      | -0.90  | -0.16 | 0.008   |
| Model 2     | -0.50                | 0.15      | -0.82  | -0.18 | 0.004   |
| Model 3     | -0.49                | 0.17      | -0.84  | -0.14 | 0.009   |

SPS, subjective psychosomatic symptoms; ITT/LOCF, Analysis by intention-to-treat principles performing imputation of missing data using the last observation carried forward method; SE, standard error; Model 1, crude mixed model; Model 2, mixed model adjusted for baseline; Model 3, mixed model adjusted for baseline, sex, age, and BMI.
