# Supplementary material for: Effect of School-Based Home-Collaborative Lifestyle Education on Reducing Subjective Psychosomatic Symptoms in Adolescents: A Cluster Randomised Controlled Trial
Source: PubMed Central journal article supplement (PMC5079616; doi:10.1371/journal.pone.0165285), 2016-10-25
Supplement: pone.0165285.s007.pdf [file pone.0165285.s007.pdf]

**S3 Table. Sensitivity analysis: Mean change of the SPS and SPS-D scores from baseline at 6 months (intervention effect on primary outcome).**

| <b>Total</b>   | <b>PPS (n = 1,420) for SPS</b> |           |               |       |                | <b>PPS (n = 1,420) for SPS-D</b> |               |       |                |       |
|----------------|--------------------------------|-----------|---------------|-------|----------------|----------------------------------|---------------|-------|----------------|-------|
|                | <b>Difference</b>              | <b>SE</b> | <b>95% CI</b> |       | <b>P value</b> | <b>SE</b>                        | <b>95% CI</b> |       | <b>P-value</b> |       |
| <b>Model 1</b> | -0.99                          | 0.42      | -1.89         | -0.10 | 0.032          | -0.57                            | 0.19          | -0.98 | -0.16          | 0.009 |
| <b>Model 2</b> | -0.74                          | 0.45      | -1.68         | 0.20  | 0.115          | -0.54                            | 0.16          | -0.88 | -0.19          | 0.005 |
| <b>Model 3</b> | -0.77                          | 0.47      | -1.76         | 0.22  | 0.122          | -0.53                            | 0.18          | -0.91 | -0.16          | 0.008 |

SPS, subjective psychosomatic symptoms; PPS, Analysis by per protocol set with the complete data set; SE, standard error; Model 1, crude mixed model; Model 2, mixed model adjusted for baseline; Model 3, mixed model adjusted for baseline, sex, age, and BMI.
