# Supplementary material for: Effect of School-Based Home-Collaborative Lifestyle Education on Reducing Subjective Psychosomatic Symptoms in Adolescents: A Cluster Randomised Controlled Trial
Source: PubMed Central journal article supplement (PMC5079616; doi:10.1371/journal.pone.0165285), 2016-10-25
Supplement: pone.0165285.s008.pdf [file pone.0165285.s008.pdf]

**S4 Table. Sensitivity analysis: Effects of lifestyle change at 6 months on resolving lifestyle factors (intervention effects on secondary outcomes; baseline-adjusted odds ratio for PPS [Models 2 & 3]).**

| Lifestyle factors                                      | PPS (n = 1,420) |        |      |         |         |        |      |         |
|--------------------------------------------------------|-----------------|--------|------|---------|---------|--------|------|---------|
|                                                        | Model 2         |        |      |         | Model 3 |        |      |         |
|                                                        | OR              | 95% CI |      | P-value | OR      | 95% CI |      | P-value |
|                                                        | Lower           | Upper  |      | Lower   | Upper   |        |      |         |
| <b>Enjoying school life (very much)</b>                | 0.49            | 0.28   | 0.86 | 0.013   | 0.47    | 0.28   | 0.81 | 0.006   |
| <b>Taking exercise and stretching</b>                  | 1.01            | 0.73   | 1.39 | 0.936   | 1.01    | 0.74   | 1.38 | 0.970   |
| <b>Fast sleep at 12 AM (midnight)</b>                  | 0.94            | 0.61   | 1.46 | 0.799   | 0.94    | 0.66   | 1.33 | 0.708   |
| <b>More than 6 hours sleep</b>                         | 0.88            | 0.68   | 1.13 | 0.293   | 0.85    | 0.66   | 1.08 | 0.187   |
| <b>Health condition (very good)</b>                    | 0.87            | 0.64   | 1.17 | 0.359   | 0.82    | 0.60   | 1.13 | 0.221   |
| <b>Staple food<sup>1)</sup> consumed per breakfast</b> | 0.66            | 0.47   | 0.91 | 0.014   | 0.60    | 0.43   | 0.86 | 0.005   |
| <b>Main dishes<sup>2)</sup> consumed per breakfast</b> | 0.73            | 0.53   | 0.99 | 0.043   | 0.70    | 0.53   | 0.93 | 0.015   |
| <b>Vegetables consumed per breakfast</b>               | 0.66            | 0.45   | 0.96 | 0.031   | 0.64    | 0.46   | 0.89 | 0.008   |
| <b>Main dishes consumed per lunch</b>                  | 0.95            | 0.59   | 1.52 | 0.835   | 0.96    | 0.61   | 1.53 | 0.872   |
| <b>Vegetables consumed per lunch</b>                   | 1.19            | 0.85   | 1.65 | 0.306   | 1.19    | 0.86   | 1.64 | 0.298   |
| <b>Dairy products consumed per day</b>                 | 0.80            | 0.55   | 1.17 | 0.261   | 0.81    | 0.60   | 1.11 | 0.192   |
| <b>Not consumed fatty foods</b>                        | 0.94            | 0.64   | 1.36 | 0.734   | 0.91    | 0.64   | 1.32 | 0.628   |
| <b>Not consumed snacks after 10 PM</b>                 | 1.12            | 0.82   | 1.52 | 0.484   | 1.08    | 0.79   | 1.49 | 0.621   |

PPS, Analysis by per protocol set with the complete data set; OR (odds ratio) < 1 indicates favourable for resolving lifestyle factors; Model 2, mixed model adjusted for baseline; Model 3, mixed model adjusted for baseline, sex, age, and BMI; 1) Staple food: rice, bread, etc.; 2) Main dishes: fish, soy, eggs, meat, etc.
